# Supplementary material for: A Comparison of Infection Venues of COVID-19 Case Clusters in Northeast China
Source: Int J Environ Res Public Health. 2020 Jun 3;17(11):3955. doi: 10.3390/ijerph17113955 (PMC7312430; doi:10.3390/ijerph17113955)
Supplement: Supplementary file 1 [file ijerph-17-03955-s001.xlsx]

## Sheet: Paper Infomation
Title
	A Comparison of Infection Venues of COVID-19 Case Clusters in Northeast China
Authors
	Pengcheng Zhao 1, *, Nan Zhang 1 and Yuguo Li 1,2
	1 Department of Mechanical Engineering, The University of Hong Kong, Hong Kong postal code 999077, China; zhangnan@hku.hk (N.Z.); liyg@connect.hku.hk (Y.L.) 2 School of Public Health, The University of Hong Kong, Hong Kong postal code 999077, China * Correspondence: zpc0808@connect.hku.hk; Tel.: +852-5228-5836
Supplementary Information - Table S1
I.	Cases in Liaoning
II.	Cases in Jilin
III.	Cases in Heilongjiang
IV.	Data of Figure 2a
V.	Data of Figure 2c
VI.	Data of Figure 3
VI.	Data of Figure 4

## Sheet: Cases in Liaoning
City	No	Name	Gender	Age	Imported case	Relation to the infection source	Trace of travelling	Date of onset	Date of diagnosis	Date of confirm
	In each city		Male, M; Female, F.		From WuHan, Y; From HuBei, Y*; From the other places outside of the province, Y**.
All the cases in Liaoning	https://xw.qq.com/amphtml/LNC2020020300096800
Shenyang	http://www.shenyang.gov.cn/syszf/zt/fkxx/yqtb/glist.html
	1	/	M	40	Y				2020-01-14
	2	/	F	50	Y	Possible source	Train G1272 (staff); Clinic	2020-01-16	2020-01-22
	3	/	F	22	Y	Relative (daughter) of ShenYang-1	Train G1216 passenger	2020-01-23
	4	/	F	21	Y	Source	Flight HU7789; Restaurant; KTV; Home	2020-01-23	2020-01-24
	5	/	M	44	N	Relative (father) of ShenYang-3		2020-01-24	2020-01-24
	6	/	F	45	N	Relative (mother) of ShenYang-3		2020-01-25	2020-01-26
	7	/					Funeral			2020-01-26
	8	/	F	40	Y	Possible source	Flight JD5628, GJ8876	2020-01-26	2020-01-26
	9	/	M	21	N	Have dinner with ShenYang-3	KTV; Restaurant with Friend	2020-01-27	2020-01-28
	10	/	F	56	N		Taxi driver (to airplane)	2020-01-23	2020-01-29
	11	/	M	27	Y	Possible source	Train G1272, G1274 (staff)	2020-01-21	2020-01-29
	12	/	M	38	Y		Flight GJ8876; Private car; Home	2020-01-29	2020-01-29
	13	/	M	39	Y**	Stranger in the same flight with Changchun-2	(ShiJiaZhuang, HeBei PR) Train G47 (5-6D), C1118; Hotel; Flight JD52221, DR6562; Bus; Taxi; SPA; Restaurant	2020-01-23	2020-01-31
	14	/	M	39	Y*	Possible source	(YingCheng, HuBei PR) Private Car; Pharmacy; Taxi	2020-01-30	2020-01-30
	15	/	F	30	Y		Touch with a patient; Flight GS6635 (10A,10C); Private car		2020-02-02
	16	/	M	34	Y	Relative (husband) of ShenYang-14	Touch with a patient; Flight GS6635 (10A,10C); Private car		2020-02-02
	17	/	M	39	Y	Possible source; Relative (husband) of ShenYang-7	Flight GJ8876; Private car; Home; Fruit market	2020-02-02	2020-02-02
	18	/	M	70	Y	Possible source; Relative (father) of ShenYang-7	Flight GJ8876; Private car; Home		2020-02-03
	19	/	F	63	Y	Possible source; Relative (mother) of ShenYang-7	Flight GJ8876; Private car; Home		2020-02-03
	20	/	M	47	Y**		(XinYang, HeNan PR) Touch with a patient; Train Z236; Clinic		2020-02-02
	21	/	F	41	N	Source	Home	2020-01-28	2020-02-02
	22	/	M	58	Y**		(HeBei PR)Train G1272, G1261		2020-01-27	2020-02-04
	23	/	M	67	Y		Private car; Hotel		2020-02-04
	24	/	F	39	Y*	Possible source; Relative of ShenYang-13	(YingCheng, HuBei PR) Private car		2020-02-05
	25	/	F	66	N	Relative (mother) of ShenYang-20	Home		2020-02-06
	26	/	M	29	N		Private car (to JiLin PR); Fruit market	2020-02-03	2020-02-06
	27	/	F	65	Y*	Possible source; Relative of ShenYang-13	(YingCheng, HuBei) Private car
	28	/	M	50	Y		Train Z186; Taxi; Home		2020-02-10
Dalian	http://hcod.dl.gov.cn/web/guest/15
	1	/	M	33	Y		Live in WuHan; Flight	2020-01-11	2020-01-17
	2	/	M	37	Y	Source	Work in WuHan; Flight	2020-01-16	2020-01-23
	3	/	M	46	Y	Source (重症)	Private car; Restaurant; Home; Taxi	2020-01-11	2020-01-24
	4	/	M	36	Y		Went to WuHan for Conference	2020-01-17	2020-01-17
	5	/	F	78	N	Relative (mother) of DaLian-3 (重症)	Home
	6	/	M	37		Source
	7	/	F	36
	8	/	M	55	N	Relative (old brother) of DaLian-3 (普通型)	Home
	9	/	F	35	N	Relative (wife) of DaLian-6
	10	/	M	60	N	Relative (father in law) of DaLian-6
	11	/	M	72	Y**		(Overseas) Travel in a group having a patient
	12	/	F	63	N	Relative (mother) of DaLian-2	Home		2020-01-30
	13	/	M	53	Y**		(ShangHai) Flight CZ6516 (39B); Train G4122(1-6F); Taxi; Private car; Flight; Home	2020-01-25	2020-01-29	2020-02-04
	14	/	M	49	Y		Annual conference in WuHan; Travel in Japan; Flight CZ8312 (54H); Private car	2020-02-01	2020-02-02	2020-02-04
	15	/	F	61	N		Hospital; Bus; Home	2020-02-03	2020-02-06	2020-02-07
	16	/	F	79	N		Home	2020-02-06	2020-02-06	2020-02-07
	17	/	F	28	N	Source	Hospital; Private car; Metro; Supermarket; Fruit market; Home	2020-02-08	2020-02-10	2020-02-13
	18	/	M	55	N	Relative (father in law) of DaLian-17	Home	2020-02-14		2020-02-13
	19	/	F	59	N	Relative (mother in law) of DaLian-17	Home			2020-02-15
	20	/	M	46	Y	A TaiWan traveller	Flight CZ6513 (57H); Market; Restaurant; Taxi; Mall			2020-02-06
Jinzhou	http://www.1m3d.com/forum-340-24.html
	1	/	M	36	Y	Possible source	Private car; Home	2020-01-23	2020-01-23	2020-01-27
	2	/	F	34	Y	Possible source; Relative (wife) of JinZhou-1	Private car; Home	2020-01-27	2020-01-27	2020-01-28
	3	/	M	26	Y*		(HuangGang, HuBei PR) Train D740, G381; Taxi	2020-01-27	2020-01-27	2020-01-28
	4	/	M	35	Y	Source	Exposition conference in WuHan; Hotel; Flight JD5627; Train D8076	2020-01-23	2020-01-27	2020-01-28
	5	/	F	34	N	Relative (wife) of JinZhou-4	Home	2020-01-28	2020-01-29	2020-01-30
	6	/	F	63	Y	Possible source; Relative (mother) of JinZhou-1	Private car; Home	2020-01-30	2020-01-30	2020-01-30
	7	/	M	38	Y		Conference in WuHan; Hotel	2020-01-29	2020-01-30	2020-01-30
	8	/	F	8	N	Relative (daughter) of JinZhou-4	Home	2020-01-31	2020-01-31	2020-02-07
	9	/	F	55	N	Relative (mother in law) of JinZhou-4	Home	2020-01-28		2020-02-03
	10	/	M	65	Y	Possible source; Relative (father) of JinZhou-1	Private car; Home	2020-02-07	2020-02-07	2020-02-08
	11	/	M	56	N	Relative (father in law) of JinZhou-4	Home	2020-02-09		2020-02-04
	12	/	F	8	Y	Possible source; Relative (daughter) of JinZhou-1	Private car; Home	2020-02-11		2020-02-02
Huludao	http://news.163.com/20/0217/22/F5KBO9UA00019K82.html
	1	/	M	62	Y	Possible source	Train G1278; RT-MART supermarket; Market; Restaurant; Pharmacy;	2020-01-22	2020-01-22	2020-01-24
	2	/	F	58	Y	Possible source; Relative (wife) of HuLuDao-1	Train G1278; RT-MART supermarket; Market; Restaurant; Pharmacy;	2020-01-22	2020-01-22	2020-01-24
	3	/	F	60	Y	Possible source	Train G1278 (12); Restaurant; Supermarket; Market; Bus; Private car; Clinic	2020-01-23	2020-01-28	2020-01-29
	4	/	M	26	Y		Flight MU2478; Restaurant; RT-MART supermarket; Pharmacy	2020-01-27	2020-01-28	2020-01-29
	5	/	M	29	Y**	Source	(BeiJing) Conference in BeiJing and meet people from HuBei; Gym; Hotel; Restaurant; Home		2020-01-30	2020-01-31
	6	/	M	33	N	Relative (son) of HuLuDao-3	Private car; Home; Shop	2020-02-02	2020-02-02	2020-02-02
	7	/	M	61	Y**	Possible source	(XiAn, ShaanXi PR) Mall; Home; Train K2046 (11-1,2 in sleeping car); Clinic	2020-01-29	2020-02-02	2020-02-05
	8	/	M	60	Y	Possible source; Relative (Boyfriend) of HuLuDao-3	Train G1278 (12); Restaurant; Supermarket; Market; Bus; Private car; Clinic	2020-02-02	2020-02-02	2020-02-07
	9	/	M	85	N	Relative (father) of HuLuDao-7 (重症)	Home			2020-02-07
	10	/	F	57	N	Relative (mother) of HuLuDao-5	Market; Home			2020-02-04
	11	/	F	81	N	Relative (mother) of HuLuDao-7	Home			2020-02-09
	12	/	F	64	Y**	Possible source; Relative (wife) of HuLuDao-7	(XiAn, ShaanXi PR) A patient is in her residential estate; Home; Train K2046 (11-1,2, sleeping car); Clinic			2020-02-10
Panjin	https://xw.qq.com/amphtml/LNC2020020300096800
	1	/	M	64	Y	Source	Train G1290 (13-6c), D52 (6-5A,5B); Daughter's home; Private car		2020-01-25	2020-01-26
	2	/			Y	Possible source	Private car; Home		2020-01-26
	3	/	M		N	Source	(BeiJing) Train G240 (8-6A), Z61 (18-132), G382 (9-6A); Easyhome Annual conference (BeiJing); Private car		2020-01-24
	4	/	F	38	N	Relative (daughter) of PanJin-1	Train D52 (6-5A,5B); Home			2020-01-31
	5	/	M		N	Relative (father in law) of PanJin-3	Home; Private car; Hospital			2020-01-31
	6	/	F		Y	Possible source; Relative (wife) of PanJin-2	Private car			2020-01-31
	7	/	F		Y	Possible source; Relative (mother in law) of PanJin-2	Private car			2020-01-31
	8	/	F	32		Relative (wife) of PanJin-3		2020-01-27	2020-01-27	2020-01-31
	9	/	M	50	Y**	Source	(KunMing, YunNan PR) Flight DR6535 (18A); Private car; Bus; Parents' home	2020-01-25	2020-01-25	2020-02-06
	10	/	F	47	N	Relative (wife) of PanJin-9	Private car; Bus; Parents-in-law's home; Pharmacy	2020-02-02	2020-02-06	2020-02-06
	11	/	M	25	N	Relative (son) of PanJin-9	Private car; Bus; Grandparents's home; shop	2020-02-06	2020-02-06	2020-02-06
Dandong	https://new.qq.com/omn/20200206/20200206A07Q1000.html?pc
	1	/	M	25	Y	The same flight with DaLian-3	Flight CZ6513 (41K); Train D7719 (4-12C); Taxi	2020-01-21	2020-01-23
	2	/	M	22	Y*		(ShiYan, HuBei PR) Flight CA8938; Metro; Hotel; Train D7741 (1-7D);	2020-01-23	2020-01-23
	3	/	M	37	Y**		(Beijing) Private Car; Hotel; Clinic	2020-01-21	2020-01-22
	4	/	F	39	Y		Train D5688 (9), T182 (dinner car); Bus; Pharmacy; Supermarket; Mall; Market		2020-01-25
	5	/	F	31	Y		Train Z208 (15-18, sleeping car), G1298 (7-18C), G8105 (6-15C); Private car; Supermarket; Taxi	2020-01-26	2020-01-27
	6	/	M	38	Y		Flight CZ6426 (50C); Taxi; Hotel; Train D7757 (12-14C); Market; Pharmacy	2020-01-30	2020-01-30
	7	/	F	39	Y	Stranger in the same flight with Changchun-2	(Hohhot, Inner Mongolia Autonomous Region) Flight DR6562 (8B), D7665 (2-A,B,C); Taxi; Hotel; Supermarket; Bank; SPA; Home	2020-02-02	2020-02-02
	8	/	F	35	N		Clinic	2020-02-15	2020-02-24	2020-02-29
	9	/	F	52	N	Relative (mother) of DanDong-10	Shop; Market; Private car; Office; Home	2020-02-22	2020-02-22	2020-02-29
	10	/	M	30	Y**		(ShenShen, GuangDong PR) Market; Home	2020-02-29	2020-03-01	2020-03-01
	11	/	M	57	N	Relative (father) of DanDong-10	Office; Private car; Home; Hospital;			2020-03-02
Fuxin	http://www.sohu.com/a/372321607_711745
	1	/	F	47	Y*	Possible source	(XiangYang, HuBei PR) Flight ZH8308; Bus; Private car; Taxi; Restaurant; Pharmacy		2020-01-31
	2	/	M	48	Y*	Possible source; Relative (husband) of FuXin-1	(XiangYang, HuBei PR) Flight ZH8308; Bus; Private car; Taxi; Restaurant; Pharmacy		2020-01-31
	3	/	F	34	Y**	Possible source	(YunNan, KunMing PR) Travel in a group with people from WuHan; Flight CZ6404; Private car; Supermarket		2020-01-31	2020-02-02
	4	/	F	55	N	Relative of FuXin-1	Home of parents in law for dinner; Private car; Mall; Pharmacy		2020-02-01
	5	/	M	52	N	Relative of FuXin-1	Home of parents in law for dinner; Private car; Funeral		2020-02-01
	6	/	F	55	Y**	Passenger (the same coach) of ShenYang-10	(XuZhou, JiangSu PR) Train G1274 (3); Company; Hospital; Taxi; Pharmacy; RT-MART supermarket;	2020-01-23	2020-01-31
	7	/	F	81	N	Relative of FuXin-6	Home	2020-01-24	2020-02-01
	8	/	M	37	Y**	Possible source; Relative (husband) of FuXin-3	(YunNan, KunMing PR) Travel in a group with people from WuHan; Flight CZ6404; Private car; Supermarket			2020-02-10
Tieling	1	/	M	51	N	Source	Train G1278; SPA; Restaurant		2020-01-22	2020-01-25
	2	/	F	25	Y		Flight CZ6520; Taxi; SPA; Restaurant	2020-01-20	2020-01-23
	3	/	M	51	N	Friend of TieLing-1	Talking at home with TieLing-1	2020-01-29	2020-01-29	2020-01-30
	4	/	F	26	N	Possible source; Stranger of ChangChun-26	Train K7459 (7); Restaurant; Police station; Clinic	2020-01-27		2020-02-08
	5	/	F	81	N	Relative of TieLing-3	Home			2020-02-02
	6	/	M	48	N	Friend of TieLing-3	Company; Home			2020-02-03
	7	/	M	26	N	Possible source; Stranger of ChangChun-26; Relative (Boyfriend) of TieLing-4	Train K7459 (7); Market			2020-02-09
Chaoyang	http://ln.sina.com.cn/news/2020-02-01/detail-iimxxste8047463.shtml
	1	/	M	42	Y	Possible source	Train G520 (11-10D); Conference; Hotel; Private car; Restaurant	2020-01-20	2020-01-23	2020-01-24
	2	/	M		Y		Private car	2020-01-21	2020-01-22	2020-01-24
	3	/	M	72	Y	Possible source; Relative (father) of ChaoYang-1	Flight CZ3137; Private car; Home		2020-01-28	2020-01-28
	4	/	F	42	Y	Possible source; Relative (wife) of ChaoYang-1	Flight CZ3137; Private car; Home	2020-01-28	2020-01-28	2020-01-29
	5	/	F	48	N	Stranger (doctor) of HuLuDao-3	Clinic doctor; Clinic		2020-01-29
	6	/	F	4	Y	Relative (doughter) of ChaoYang-1	Flight CZ3137; Private car; Home			1900-01-31
Anshan	1	/	M	53	Y*	Possible source; Friend of LiaoYang-2	(Ezhou, HuBei PR) Restaurant, Private car; Taxi
	2	/	F	71	N	Relative (mother) of PanJin-9	Home dinner	2020-01-31	2020-02-04
	3	/	M	73	N	Relative (father) of PanJin-9	Home dinner	2020-02-01	2020-02-04
	4	/	F	45	N	Relative (little brother's wife) of PanJin-9	Home dinner		2020-02-06
Benxi	1	/	F	31	Y		Train T182, D7625; Supermall		1900-01-23
	2	/	M	31	Y	Relative (husband) of BenXi-1	Train T182, D7625;		1900-01-23
	3	/	F	63	Y**		(GuangZhou, GuangDong PR) Flight BK2820 (11F,11E);Train D2995 (5-4A,C), K27 (5-24, middle bed in sleeping car)	1900-01-12	1900-01-15
Liaoyang	1	/	M	43	Y		Flight JD5627 (34F); Private car		1900-01-21
	2	/	F	43	Y*	Possible source	(Ezhou, HuBei PR) Restaurant; Private car; SPA; Shop		2020-01-26
	3	/	M	46	Y*	Possible source; Relative (husband) of LiaoYang-2	(Ezhou, HuBei PR) Restaurant; Private car; SPA; ATM; Shop; Pharmacy		2020-01-30
Yingkou	1	/	M	56	Y		Private car; Restaurant	2020-01-23	2020-01-23

## Sheet: Cases in Jilin
City		No	Name	Gender	Age	Imported case	Relation to the infection source	Trace of travelling	Date of onset	Date of diagnosis	Date of confirm
		In each city		Male, M; Female, F.		From WuHan, Y; From HuBei, Y*; From the other places outside of the province, Y**.
Changchun	http://cc.bendibao.com/news/2020211/47480.shtm	1	/	F	42	Y		Flight CZ3695; Taxi		1900-01-19
		2	/	M	50	Y	Source	Flight DR6562; Train G8011 (1-12D); Wal-Mart supermarket; Restaurant		1900-01-24
		3	/	M	79	N	Relative (father) of ChangChun-2	Home		2020-01-28
		4	/	F	80	N	Relative (mother) of ChangChun-2	Home
		5	/	F	48	N	Relative (little sister) of ChangChun-2	Home; Shop
		6	/	M	49	N	Relative (little sister's husband) of ChangChun-2	Train G8011 (2-5B); Market; Clinic; Taxi; Home		2020-01-27
		7	/	M	24	N	Relative (little sister's son) of ChangChun-2	Home
		8	/	F	86	N	Relative (little sister's mother) of ChangChun-2	Home		2020-02-02
		9	/	M	46	Y**	Source	(BeiJing) Easyhome annual conference in BeiJing; Train G4851 (8-5B), K1571 (6-63); Bus; Restaurant; KTV; Home
		10	/	M	43	N	Friend of ChangChun-11	Easyhome annual conference in ChangChun; Train D118 (5-8D); C1001 (16-6F); Private car; Restaurant; Market		2020-01-31
		11	/	M	41	N	Friend of ChangChun-9	Easyhome annual conference in ChangChun; Park
		12	/	M	42	Y**	Friend of PanJin-3	(BeiJing) Train G399 (8-7D); Flight SC4956, MF8013; Easyhome Annual conference in BeiJing
		13	/	F	42	N	Relative (wife) of ChangChun-12	Flight SC4956, MF8013		2020-02-02
		14	/	M	47	N	Friend of ChangChun-9	Clinic		2020-02-03
		15	/	F	38	Y**	Possible source	(Thailand) Flight 9C8748 (11C)		2020-02-02
		16	/	M	40	N	Relative (husband) of ChangChun-15	Home		2020-02-02
		17	/	F	67	Y**	Possible source; Relative (mother in law) of ChangChun-15	(Thailand) Flight 9C8748 (11F)		2020-02-02
		18	/	F	11	Y**	Possible source; Relative (daughter) of ChangChun-15	(Thailand) Flight 9C8748 (11E)		2020-02-04
		19	/	M	54	Y**		(HaiNan PR) Flight JD5841		1900-01-31
		20	/	M	34	Y		Flight CA8223; HeiLongJiang relative's home		1900-01-29
		21	/	M	47	Y		Flight CZ6651; Bus		2020-01-28
		22	/	F	55	Y	Possible source	Train G1278 (10-10F); Market		2020-01-30
		23	/	M	56	Y	Possible source; Relative (husband) of ChangChun-22	Train G1278 (10-10D)		1900-01-30
		24	/	F	31	N	Relative (daughter) of ChangChun-22	Home		1900-01-30
		25	/	M	51	N		Home; Hospital		2020-02-02
		26	/	M	29	Y	Source	Patint From SiPing; T182 (9-3010), K7459 (7-117)	1900-01-22	1900-01-28
		27	/	F	27	N	Relative (wife) of ChangChun-26	Home	1900-01-23	1900-01-28
		28	/	M	42	Y*		(BeiJing) Flight CZ6123; Train C1208 (4-17D)		1900-01-29
		29	/	F	41	Y*	Relative (wife) of ChangChun-28	(BeiJing) Train K429 (9-343)		1900-01-29
		30	/	F	50	N	Relative (mother in law) of ChangChun-26	Home		1900-01-28
		31	/	F	44	N	Relative of ChangChun-2	Home		2020-02-05
		32	/	M	25	Y**		(BeiJing) Train G240 (7-4D); G399 (11-9D); Easyhome annual confernce in PeiJing; Shop; Company; Supermall
	http://cc.bendibao.com/news/2020211/47479.shtm	33	/	M	68	Y**	Possible source; Relative (father) of ChangChun-15	(Thailand) Flight 9C8748 (10F)
		34	/	M	26	Y**		(Vietnam) Contact with a patient from ZhengZhou; Flight VN474 (15); Train G8005(8)
		35	/	M	35	N		Easyhome annual confernce in ChangChun; SPA
		36	/	M	30	N	Source	Easyhome annual confernce in ChangChun; Company; Taxi; Supermarket; Pharmacy		1900-01-30
		37	/	F	53	N	Relative (mother) of ChangChun-36	Home
		38	/	M	52	N	Relative (father) of ChangChun-36	Home
		39	/	F	78	N	Source	Market; Supermall; Hair cut; SPA; Restaurant		2020-02-08
	http://cc.bendibao.com/news/2020217/47541.shtm	40	/	M	88	N	Relative (husband) of ChangChun-39	Market; Taxi; SPA; Restaurant; Pharmacy			2020-02-09
	http://cc.bendibao.com/news/2020217/47542.shtm	41	/	F	21	N*	The same coach of train with patient from other province	Train C1019 (3-13A); Taxi; Shop; Fruit market; Pharmacy	2020-02-04	2020-02-10	2020-02-10
		42	/	F	29	N	Relative (wife) of ChangChun-36	Home	2020-02-05		2020-02-09
		43	/	F	33	N	Friend of ChangChun-12	Train G8011 (5-1D,1F); D126 (6-1D,1F); Wal-Mart supermarket; Shop; Pharmacy; Company	2020-02-11		2020-02-12
		44	/	M	33	N	Relative (husband) of ChangChun-43	Train G8011 (5-1D,1F); D126 (6-1D,1F)			2020-02-14
	http://cc.bendibao.com/news/2020217/47543.shtm	45	/	F	60	N	Relative (old brother's wife) of QiTaiHe-5 (in HeiLongJiang)	(QiTaiHe, HeiLongJiang PR) Train D121 (4-4A); Home dinner in HeiLongJiang		2020-02-14
Siping	http://siping.offcn.com/html/2020/02/41615.html
Sipinng city	http://wjw.siping.gov.cn/zwgk/tzgg/202001/t20200127_349086.html	1	/	M	33	Y		Flight JD5627 (2C); Train K4023; Private car; Restaurant; Taxi; Chess room		1900-01-25	1900-01-26
	http://wjw.siping.gov.cn/zwgk/tzgg/202002/t20200204_350420.html	2	/	M	29	Y**		(BeiJing) Private car; Restaurant; SPA; Home		1900-01-29
		3	/	M	56	N		Home; Pharmacy		1900-01-30
	http://wjw.siping.gov.cn/zwgk/tzgg/202002/t20200203_350374.html	4	/	M	33	N	Friend of SiPing-1	Restaurant; Company; Home		1900-01-27
		5	/	M	30	Y**	Possible source; Stranger in the same flight with Changchun-2	(Hohhot, Inner Mongolia Autonomous Region) Flight DR6562; Train T261 (16-36); Taxi; Bus; Restaurant; KTV; Home		1900-01-29
		6	/	M	82	N*	Relative (father) of SiPing-9	Home	1900-01-26	1900-01-26
	https://www.sohu.com/a/370616736_99962334	7	/	F	32	N	Relative (old sister) of ChangChun-26	Supermarket; Taxi; But; Fruit market		2020-01-30
	https://baijiahao.baidu.com/s?id=1657690764077636734&wfr=spider&for=pc	8	/	F	27	N	Relative (girl friend) of SiPing-12	(Harbin, HeiLongJiang PR) Train K1382 (2-104), G711 (11-1B,1C), T244 (2-53,54), K1242 (5-43,44); Hotel; Restaurant; Pharmacy		2020-02-01
	http://wjw.siping.gov.cn/zwgk/tzgg/202002/t20200206_350775.html	9	/	F	46	Y		Train T182 (12-20 lower bed in sleeping car), K5001 (10-no seat); Fruit market		1900-01-26
	http://wjw.siping.gov.cn/zwgk/tzgg/202002/t20200207_350873.html ⻚	10	/	F	12	N		Train K7459 (9-37,38); Taxi; Restaurant; SPA	2020-02-03	2020-02-03
	http://wjw.siping.gov.cn/zwgk/tzgg/202002/t20200209_351339.html	11	/	F	27	N		Taxi; Hair cut; Private car; Supermall; Pharmacy; Home; Fruit market; Shop		2020-02-04
		12	/	M	28	Y**	Source	(BeiJing; Harbin, HeiLongJiang PR) Train D4509 (16-9F), G711 (11-1B,1C), T244 (2-53,54), K1242 (5-43,44); Hotel; Restaurant; Pharmacy
	http://wjw.siping.gov.cn/zwgk/tzgg/202002/t20200213_352156.html	13	/	M	25	N		Hospital; Home; Restaurant; SPA; Bank; Supermall; Private car; Taix; Clinic		2020-02-04	2020-02-12
	http://wjw.siping.gov.cn/zwgk/tzgg/202002/t20200214_352412.html	14	/	M	45	N	Friend of ChangChun-26	Meet friend at home		2020-02-12	2020-02-13
	http://wjw.siping.gov.cn/zwgk/tzgg/202002/t20200219_353575.html	15	/	M	81	N	Relative of SiPing-14	Home			2020-02-18
Gongzhuling	https://www.sohu.com/a/371137119_120543227	16	/	F	50	Y	Possible source	Train T182 (7-30); Restaurant; Bus; Private car; Restaurant; Hospital; Taxi		2020-01-26
	https://baijiahao.baidu.com/s?id=1657662324647707411&wfr=spider&for=pc	17	/	M	57	Y	Possible source; Relative (husband) of GongZhuLing-1	Train T182 (7-31); Restaurant; Bus; Private car; Restaurant; Hospital; Taxi; Hair cut		2020-01-27
		18	/	M	29	N	Relative (nephew) of GongZhuLing-2	Home dinner			2020-02-02
	https://baijiahao.baidu.com/s?id=1657732245152513475&wfr=spider&for=pc	19	/	F	41	N*		Relative (husband) is from WuHan; Home		1900-01-28	2020-02-04
	https://baijiahao.baidu.com/s?id=1657959531593055274&wfr=spider&for=pc	20	/	M	17	N	Relative (son) of GongZhuLing-4	Home		2020-02-06
		21	/	F	51	N	Relative of GongZhuLing-1	Home dinner		2020-02-06
Liaoyuan	https://baijiahao.baidu.com/s?id=1657730155946673829&wfr=spider&for=pc	1	/	M	60	Y	Source	Train T182 (5-74); Bus; Taxi; Restaurant; Shop		2020-01-25
		2	/	F	37	N	Relative (daughter) of LiaoYuan-1	Bank; Bus; Shop; Restaurant; Home			2020-02-01
		3	/	F	36	Y**		(LinYi, ShanDong PR) Private car; Hotel; Supermarket; Clinic		2020-01-30
	http://wjw.liaoyuan.gov.cn/wzsy/ggl/202002/t20200206_421363.html	4	/	M	47	N	Relative (son in law) of LiaoYuan-1	Home	2020-01-31
		5	/	F	7	N	Relative (granddaughter) of LiaoYuan-1	Bank; Bus; Shop; Restaurant; Home	2020-02-02
	http://wjw.liaoyuan.gov.cn/wzsy/ggl/202002/t20200209_422352.html	6	/	F	27	N	Contact with LiaoYuan-1	Taxi; Home	2020-01-28
	https://baijiahao.baidu.com/s?id=1658638013068429644&wfr=spider&for=pc	7	/	M	49	N		Clinic; Home		2020-02-10	2020-02-14
Tonghua	http://jl.sina.com.cn/news/yaowen/2020-01-29/detail-iihnzhha5187702.shtml	1	/	M	47	Y**	Source	(YiYang, HuNan PR) Bus; Train K1074 (6) (meet a patient from ShanDong), K7393	1900-01-27	1900-01-27	2020-01-28
	https://www.sohu.com/a/371148430_120214180	2	/	F	47	N	Relative (wife) of TongHua-1	Home
	https://new.qq.com/omn/20200209/20200209A057TU00.html?pc	3	/	F	58	Y		Flight MU2459 (43M); Train K429 (2-3)
	https://baijiahao.baidu.com/s?id=1659024889462942310&wfr=spider&for=pc	4	/	M	56	N		Hospital; Clinic; Private car; Taxi; Old people's House	2020-02-18	2020-02-18	2020-02-19
	https://baijiahao.baidu.com/s?id=1659389734967256861&wfr=spider&for=pc	5	/	F	63	N	Contact with TongHua-4	Hospital; Taxi; Home			2020-02-23
		6	/	M	64	N	Relative (husband) of TongHua-4	Hospital; Home			2020-02-23
Jilin	http://jl.sina.com.cn/news/yaowen/2020-02-05/detail-iimxyqvz0304827-p3.shtml	1	/	M	21	Y					2020-01-23
		2	/	F	67	N*	Source; Contact with a patient from WhHan	Home; Taxi; SPA		2020-01-31	2020-02-01
		3	/	M	57	Y	Train is cross WuHan	Train		1900-01-27	2020-01-27
		4	/	M	71	N	Relative of JiLin-2			2020-02-02
		5	/	F	33	Y**		(ZhuHai, GuangDong PR) Flight CZ3749 (56A); Private car		2020-01-31
Yanbian Korean Autonomous Prefecture	http://jl.sina.com.cn/news/yaowen/2020-02-05/detail-iimxyqvz0304827-p4.shtml	1	/	M	29	Y		Flight DR6598 (3E); Train G8125 (8-5C); Bus			2020-01-29
		2	/	M	27	Y		Flight CZ3695 (57H); Train C1043 (6-7A); Taxi		2020-01-24
		3	/	M	50	Y	Source	Train K974 (15-81), C1001 (2-3C)			2020-02-03
	https://baijiahao.baidu.com/s?id=1657752013978502082&wfr=spider&for=pc	4	/	F	31	N	Relative of YanBian-3	Hospital; Home		2020-01-31	2020-02-05
		5	/	F	40	Y**		(WuXi, JiangSu PR) Train; Bus; supermarket; market		2020-02-03
SongYuan	https://baijiahao.baidu.com/s?id=1657662324647707411&wfr=spider&for=pc	1	/	M	63	Y	Source	Train T168, G4731 (14-10F), G4731 (15-7F), C1541; Bus; Home		2020-01-22	1900-01-23
		2	/	M	36	N	Relative (son) of SongYuan-1	Train G4731 (15-7F), C1541; Bus; Home			2020-01-22
Baicheng	https://baijiahao.baidu.com/s?id=1657964381863488672&wfr=spider&for=pc	1	/	F	66	N	Relative (father) of Harbin-64	Home	2020-02-05		2020-02-08

## Sheet: Cases in Heilongjiang
City		No	Name	Gender	Age	Imported case	Relation to the infection source	Trace of travelli	Date of onset	Date of diagnosis	Date of confirm
		In each city		Male, M; Female, F.		From WuHan, Y; From HuBei, Y*; From the other places outside of the province, Y**.
Harbin	https://www.sohu.com/a/371373948_661528	1	/	M		Y	Possible source	Train K974 (15); Metro		2020-01-22
		2	/	M		Y	Possible source	Train K974 (15); SPA		2020-01-22
		3	/	M		Y	Possible source	Train K974 (15); Home; SPA		2020-01-22
		4	/	F		Y	Possible source	Train G1278 (2-3D)		2020-01-23
		5	/	F		Y	Possible source; The same train with Harbin-4	Train G1278 (2-4A)		2020-01-23
		6	/	M		Y	Possible source; The same train with Harbin-4	Train G1278 (2-5A)		2020-01-23
		7	/	M		Y		Train K546 (12); Taxi; Bus; Private car		2020-01-21
		8	/	M		Y	Possible source; The same train with Harbin-4	Train G1278 (15-6F); Private car		2020-01-23
		9	/	M		Y	Possible source; The same train with Harbin-4	Train G1278 (5-10F); Bus; Home		2020-01-25
		10	/	F		Y	Possible source	Train T182 (7-54)		2020-01-25
		11	/	F		Y	Possible source; The same train with Harbin-4	Train G1278 (5), D8509; Bus; Private car; Home; Restaurant		2020-01-28
		12	/	M		Y	Possible source; The same train with Harbin-4	Train G1278 (5), D8509; Bus; Private car; Home; Restaurant		2020-01-28
		13	/	M		Y	Possible source; The same train with Harbin-10	Train T182 (15-20); Private car; Home		2020-01-28
		14	/	M		N*	The same residental estate with Harbin-13; Contact with a patient from WuHan	Private car; Home
		15	/	M		Y	Possible source; The same train with Harbin-4; The same residental estate with Harbin-13	Train G1278 (5-6A), D8509; Bus; Hotel; Home		2020-01-28
		16	/	F		Y	Possible source; The same train with Harbin-10	Train T182 (11-28); Taxi; Bus; Private car; Home		2020-01-27
		17	/	F		N	Relative of Harbin-16	Private car; Home		1900-01-28
		18	/	F		Y	Possible source; The same train with Harbin-10	Train T182 (14); Taxi; Restaurant; Private car; Home		2020-01-28
		19	/	M		N	Relative (might be father) of Harbin-18	Private car; Home; Restaurant		2020-01-28
		20	/	F		N	Source	Private car; Friend's home; Market; Supermarket; Restaurant		2020-01-27
		21	/	M		N	Relative (husband) of Harbin-20	Private car; Home		2020-01-27
		22	/	F		N	Relative (daughter's daughter) of Harbin-20	Private car; Home		2020-01-30
		23	/	M		N	Doctor of Harbin-20	Private car; Home		2020-01-31
		24	/	M		N	Relative (son) of Harbin-73	Private car; Restaurant; KFC; Home		2020-02-01
		25	/	M		Y**	Relative (cousin, old brother) of Harbin-26	(ShangHai) Flight MU5619 (66C); Private car; Taxi; Teachers' apartment of Northeast Agricultural University		2020-01-27
		26	/	M		N*	Source; Contact with a patient from WuHan	Supermall; KTV; Private car; Taxi; Teachers' apartment of Northeast Agricultural University		2020-01-28	1900-01-30
		27	/	M	57	N	Relative (father) of Harbin-26	Private car; Visit Teachers' apartment of Northeast Agricultural University		2020-01-25
		28	/	F		N	Relative (father's sister) of Harbin-26	Private car; Home dinner (Teachers' apartment of Northeast Agricultural University)		2020-01-27
		29	/	M		N	Relative (grandpa) of Harbin-26	Private car; Visit Teachers' apartment of Northeast Agricultural University		2020-01-30
		30	/	F		N	Relative (grandma) of Harbin-26	Private car; Visit Teachers' apartment of Northeast Agricultural University		2020-02-01
		31	/	M		N		Private car; Home		1900-01-27
		32	/	M		Y**	Possible source	(BeiJing) Home; Train Z204, Z203 (staff)		2020-01-27
		33	/	F		N	The same mall with Harbin-20	Supermall		2020-01-25
		34	/	F		N	Possible source (to Qiqihar-4)	Shop saler; Bus; Private car; Home		2020-01-30
		35	/	F		Y**	Possible source	(KunMing, YuNan PR or WuXi, JiangSu PR) Flight DR6541 (26A); Train D8509 (6-13A), D5388 (7-11A); Private car; Home		2020-01-31
		36	/	M		Y**	Possible source; Relative of Harbin-35	(KunMing, YuNan PR or WuXi, JiangSu PR) Flight DR6541 (26B); Train D8509 (6-13B), D5388 (7-11B); Private car; Home		2020-01-31
		37	/	M		N		Supermall; Private car; Home		2020-01-27
		38	/	M		Y**	Possible source	(Thailand; ShenZhen, GuangDong PR) Flight CZ6094 (40L), CZ6481 (41B); Private car; Home		2020-01-31
		39	/	M		Y		Flight CZ6278 (56H); Bus; Taxi; Home		2020-01-24
		40	/	M		N		Bus; Pharmacy; Home		2020-02-01
		41	/	F		Y**	Source	(NingBo, ZheJiang PR) Flight ZH9766 (11C); Bar; Hotel; Private car; Bus; Home; Supermarket		2020-02-01
		42	/	F		N		Bus; Shop; Private car; Home		2020-02-01
		43	/	M		Y		Train T182
	http://hlj.people.com.cn/n2/2020/0204/c220024-33764786.html	44	/	F	21	Y**	Relative (cousin, old sister) of Harbin-26	Flight; Home dinner (Teachers' apartment of Northeast Agricultural University)	2020-01-27	1900-01-27	2020-02-03
		45	/	F	31	N	Relative (daughter in law) of Harbin-20	Taxi; Home		2020-01-30	2020-02-03
		46	/	M	57	N	Relative (aunt's husband) of Harbin-26	Home; Supermarket; Home dinner (Teachers' apartment of Northeast Agricultural University)		2020-01-27	2020-02-03
		47	/	M	23	N	Relative (1st little brother's son) of Harbin-20	Private car; Taxi; Home		2020-01-30	2020-02-03
		48	/	F	41	N	Baby-sister of Harbin-22	Train D6917; Private car; Home; Supermarket		2020-02-02	2020-02-03
		49	/	M	17	N	Possible source	Bus; Private car; Restaurant; KFC; Home; SPA		2020-01-23	2020-02-03
		50	/	F		N	Relative (mother) of Harbin-26	Taxi; Visit Teachers' apartment of Northeast Agricultural University		2020-01-27	2020-02-03
		51	/	M	44	N	Relative (2nd little brother) of Harbin-20	Home; Restaurant		2020-01-30	2020-02-03
		52	/	F	76	N		Metro; Private car; Home; Supermarket		2020-01-29	2020-02-03
		53	/	M	54	N	Possible source	Bus; Supermarket		2020-02-01	2020-02-03
		54	/	F	55	N	Possible source; Relative (wife) of Harbin-53	Bus; Supermarket		2020-02-01	2020-02-03
		55	/	M	73	N	The same residential estate with Harbin-40	Taxi; Home; Restaurant		2020-02-01	2020-02-03
		56	/	F	34	Y	Possible source	Train K974 (13); Private car; Home; Supermarket		2020-01-26	2020-02-03
		57	/	F	58	N	Relative (mother) of Harbin-56	Private car; Home		2020-01-26	2020-02-03
		58	/	F	52		Possible source	Home		2020-02-01	2020-02-03
		59	/	F	55		Possible source	Private car; Home		2020-02-02	2020-02-03
		60	/	F	68	Y**	Possible source; Relative (mother) of Harbin-38	(ShenZhen, GuangDong PR) Flight CZ6481 (44L); Taxi; Home		2020-02-02	2020-02-03
		61	/	F	30	Y**		(Kuala Lumpur, Malaysia) Flight MF870; Taxi; Home		2020-01-28	2020-02-03
		62	/	M	48	N	Relative (1st little brother) of Harbin-20	Home; Supermarket		2020-01-30	2020-02-04
		63	/	F	59	N	Relative (father's mother) of Harbin-22	Home		2020-02-01	2020-02-04
		64	/	M	41	Y	The same train with Harbin-32	Flight CA182, CA1824; Train Z203		2020-02-03	2020-02-04
		65	/	F	59	N		Home		2020-01-17	2020-02-04
		66	/	F	43	N	Possible source	Home		2020-02-03	2020-02-04
		67	/	F	60	N		Home		2020-01-27	2020-02-04
		68	/	M	61	N	Relative (father's father) of Harbin-22	Home		2020-02-03	2020-02-04
		69	/	F	43	N	Possible source; Relative (wife) of Harbin-70	Hair cut staff;		2020-02-03	2020-02-04
		70	/	M	45	N	Possible source	Train D7812 (3-1A), D9125 (2-13); Bus; Home		2020-01-31	2020-02-04
		71	/	F	24	Y**		(Might be ChangSha, HuNan PR) Flight CZ6620 (52B); Bus; Private car; Home		2020-01-19	2020-02-04
		72	/	M	32	N	The same mall with Harbin-20; Relative (Son) of Harbin-20	Mall		2020-01-27	2020-02-04
		73	/	M	64	N	The same mall with Harbin-20	Mall; Private car; Home; Pharmacy		2020-02-01	2020-02-04
	http://www.ddcpc.cn/zhengnengliang/202002/t20200206_809341.shtml	74	/	F		N	Possible source;	Bus; Private car; Home		2020-01-27	2020-02-05
		75	/	F		N	The same residential estate with Harbin-32	Home; Restaurant		2020-01-27	2020-02-05
		76	/	F		N		Restaurant		2020-02-04	2020-02-05
		77	/	F		N*	Contact with a tourist from WuHan	Clinic; Hotel staff		2020-02-02	2020-02-05
		78	/	M		N*	Contact with people from HuBei; The same train with Harbin-164	Flight CZ3227; Train D9127 (12-10B), D7812 (2-3C), D5383 (7-7; 4-5B), D7804 (4-13F); Hotel; Supermarket		2020-02-03	2020-02-05
		79	/	M		N	Relative (husband) of Harbin-56	Private car; Pharmacy; Home		2020-01-26	2020-02-05
		80	/	M		N	Relative (son) of Harbin-56	Train K9858 (1-40,41), D29, K7218; Flight; Metro; Train; Home; Supermarket			2020-02-05
		81	/	F		N	Source	Home		2020-02-04	2020-02-05
		82	/	F		N	Relative of Harbin-20	Home		2020-02-02	2020-02-05
	http://www.39yst.com/area/yiqing/545196.shtml	83	/	M		N	Source	Expressman; Apartment; Hotel; Home		2020-02-05	2020-02-06
		84	/	F		N	The same mall with Harbin-20	Bus; Home; Supermarket		2020-02-05	2020-02-06
		85	/	F		N		Supermall; Clinic; Pharmacy		2020-01-28	2020-02-06
		86	/	M		N	Relative (grandpa) of Harbin-49	Home			2020-02-06
		87	/	M		N	Relative (father) of Harbin-49	Train K4837 (10-111); Bus; Home		2020-01-23	2020-02-06
		88	/	F		N	Relative (mother) of Harbin-49	Private car; Home; Shop		2020-02-02	2020-02-06
		89	/	M		Y**	Source	(ShangHai) Flight MU5517; Bus; Home; Restaurant			2020-02-06
		90	/	F		N	Relative of Harbin-58	Home dinner; Clinic; Restaurant		2020-02-03	2020-02-06
		91	/	F		N	Possible source; Relative of Harbin-74	Private car; Home			2020-02-06
		92	/	M		N	Possible source; Relative of Harbin-74	Home			2020-02-06
		93	/	M		N	Possible source; Relative of Harbin-59	Home			2020-02-06
		94	/	F	30	N		Home		2020-02-03	2020-02-06
	http://www.39yst.com/area/yiqing/545392.shtml	95	/	M		N	The same residental estate with Harbin-66	Private car; Home		2020-02-05	2020-02-07
		96	/	F		N	The same restaurant with Harbin-89	Home; Restaurant			2020-02-07
		97	/	M		N	Relative of Harbin-96	Dinner in Harbin-96's home; Supermarket; Restaurant		2020-02-05	2020-02-07
		98	/	F		Y**	Possible source	(HangZhou, ZheJiang PR) Train K552; Dinner in Harbin-97's home; Restaurant		2020-02-05	2020-02-07
		99	/	F		Y**	Possible source; Relative of Harbin-97	(BeiJing) Train T17; Dinner in Harbin-96's home; Restaurant		2020-02-05	2020-02-07
		100	/	F		Y**	Possible source; Relative of Harbin-97	(BeiJing) Train T17; Dinner in Harbin-96's home; Supermarket; Restaurant		2020-02-05	2020-02-07
		101	/	M		N*	Contact with a realtive who contacts with people from WuHan	Home; Restaurant		2020-02-05	2020-02-07
	http://heb.bendibao.com/news/2020210/53404.shtm	102	/	F		Y**	Relative of Harbin-105	(BeiJing; ShenYang, LiaoNing PR) Private car; Flight CZ6203, CZ6218; Taxi; Home; Supermarket; Restaurant		2020-02-06	2020-02-08
		103	/	M		N	Relative of Harbin-105	(BeiJing; ShenYang, LiaoNing PR) Private car; Home; Restaurant		2020-02-06	2020-02-08
		104	/	M		N	Source	Private car; Home		2020-02-04	2020-02-08
		105	/	F		N	Work in the same mall with Harbin-20	Private car; Home; Restaurant		2020-01-28	2020-02-08
		106	/	M		Y**	Source	(SanYa, HaiNan) Flight CN7169; Private car; Home; Restaurant		2020-02-05	2020-02-08
		107	/	M		N		Train K7106 (5); Private car; Home; Supermarket		2020-02-07	2020-02-08
		108	/	F		N	Source	Private car; Home; Supermarket		2020-02-07	2020-02-08
		109	/	F		N	Source	Private car; Home dinner		2020-02-08	2020-02-08
		110	/	M		N	The same restaurant with Harbin-73	Private car; Home; Restaurant		2020-02-06	2020-02-08
		111	/	M		N	Relative of Harbin-109	Home		2020-02-07	2020-02-08
		112	/	M		N	Relative of Harbin-164	Home dinner; Company; Restaurant; Fruit market		2020-02-04	2020-02-08
		113	/	F		N	Relative of Harbin-106	Private car; Home; Restaurant		2020-02-07	2020-02-08
		114	/	F		N	The same train with JiXi-12	Bus; Train K7075 (6-7,middle bed in sleeping car), K7178 (4-6,middle bed in sleeping car); Bus; Home; Supermarket; Pharmacy		2020-02-07	2020-02-08
		115	/	M		N	Relative of Harbin-53	Private car; Home dinner		2020-02-07	2020-02-08
		116	/	M		N	Relative of Harbin-109	Home		2020-02-08	2020-02-08
	http://heb.bendibao.com/news/2020211/53429.shtm	117	/	F		Y**	Relative of Harbin-97	(NanJing, JiangSu PR) Train K552; Home; Restaurant		2020-02-05	2020-02-09
		118	/	F		Y**	Relative of Harbin-97	(NanJing, JiangSu PR) Train K552; Home; Restaurant		2020-02-05	2020-02-09
		119	/	F		N	Source	Home		2020-01-30	2020-02-09
		120	/	F		N	The same residential estate with Harbin-84	Bus; Home; Residential estate			2020-02-09
		121	/	M			Relative of Harbin-109	Clinic		2020-02-08	2020-02-09
		122	/	F		N	Source; Relative of JiXi-17; The same train with JiXi-12	Bus; Train K7075 (6-7,lower bed in sleeping car), K7178 (+6-11,upper bed in sleeping car; Private car; Home; Supermarket		2020-02-07	2020-02-09
		123	/	F			Relative (daughter) of Harbin-83	Taxi; Home		2020-02-07	2020-02-09
		124	/	F		N	Relative of Harbin-81	Private car; Home		2020-02-07	2020-02-09
		125	/	F		N	Relative (wife) of Harbin-83	Home		2020-02-07	2020-02-09
		126	/	F		N		Bus; Home; Supermarket; Hospital as a nurse		2020-02-06	2020-02-09
		127	/	M		N	Relative (son) of Harbin-105	Private car; Home; Restaurant		2020-02-01	2020-02-09
		128	/	F		N	Source	Home		2020-02-07	2020-02-09
		129	/	F		N	Relative of Harbin-164	Home dinner; Restaurant		2020-02-08	2020-02-09
		130	/	F		N	Relative of Harbin-128	Home		2020-02-07	2020-02-09
	http://heb.bendibao.com/news/2020212/53449.shtm	131	/	F		N	Relative of Harbin-18	Private car; Home		2020-01-28	2020-02-10
		132	/	M		N		Taxi; Bus; Home		2020-02-07	2020-02-10
		133	/	M		N	Source	Bus; Fruit market		2020-02-08	2020-02-10
		134	/	M		N	Source	Home; Restaurant		2020-02-07	2020-02-10
		135	/	F		N	Relative of Harbin-97	(HangZhou, ZheJiang PR; TianJin) Flight CA1674; Train G393; Private car; Home; Supermarket; Restaurant		2020-02-10	2020-02-10
		136	/	F		N	Relative of Harbin-97	Home		2020-02-08	2020-02-10
		137	/	F		N	Relative of Harbin-97	Home; Restaurant		2020-02-08	2020-02-10
		138	/	M		N	Relative of Harbin-97	Home		2020-02-09	2020-02-10
		139	/	F		N	Relative of Harbin-106	Bus; Private car; Bus; Taxi; Home; Supermarket; Restaurant		2020-02-09	2020-02-10
		140	/	M		N		Private car; Taxi; Home		2020-02-08	2020-02-10
		141	/	M		N	Relative (might be her father) of Harbin-105	Private car; Home; Restaurant		2020-02-08	2020-02-10
		142	/	M		N		Taxi; Home; Restaurant		2020-02-04	2020-02-10
		143	/	F		N	Relative of Harbin-109	Private car; Home		2020-02-07	2020-02-10
		144	/	F		N	Relative of Harbin-109	Private car; Home; Restaurant		2020-02-07	2020-02-10
		145	/	M		N	Relative of Harbin-128	Home		2020-02-07	2020-02-10
		146	/	F		N	Relative of Harbin-109	Home		2020-02-08	2020-02-10
		147	/	M		N	Relative of Harbin-101	Bus; Bus; Home		2020-02-09	2020-02-10
		148	/	F		N		Private car; Home		2020-02-09	2020-02-10
	https://www.sohu.com/a/372479770_115402	149	/	F		N	Friend of Harbin-108	Private car; Home dinner; Restaurant		2020-02-04	2020-02-11
		150	/	M		Y**	Relative of Harbin-119	(QingDao, ShanDong PR) Flight MF8019 (42A); Train D8526; Taxi; Home; Shop		2020-02-09	2020-02-11
		151	/	F		N	Relative of Harbin-40	Bus; Private car; Home		2020-02-02	2020-02-11
		152	/	F		N	Relative of Harbin-109	Home		2020-02-09	2020-02-11
	http://heb.bendibao.com/news/2020214/53493.shtm	153	/	M		N	Relative of Harbin-105	Private car; Home; Restaurant		2020-02-08	2020-02-12
		154	/	F		N	Relative of Harbin-105	Private car; Home; Restaurant		2020-02-08	2020-02-12
		155	/	M		N	Relative of Harbin-106	Private car; Home dinner; Restaurant		2020-02-10	2020-02-12
		156	/	F		N	Relative of Harbin-119	Home; Restaurant		2020-02-09	2020-02-12
		157	/	F		N*	A relative is a patient	Private car; Home; Restaurant		2020-02-07	2020-02-12
		158	/	F		N	The same residential estate with Harbin-156	Home		2020-02-10	2020-02-12
		159	/	F		N	Relative of Harbin-104	Private car; Home; Restaurant		2020-02-10	2020-02-12
		160	/	F		N	Relative of Harbin-157	Private car; Home; Restaurant		2020-02-10	2020-02-12
		161	/	M		N	Relative of Harbin-105	Taxi; Home; Supermarket; Restaurant		2020-02-08	2020-02-12
	http://heb.bendibao.com/news/2020214/53507.shtm	162	/	F		N	Relative of Harbin-134	Home; Restaurant			2020-02-13
		163	/	F		N*	Talk with a friend who is then diagnosed as a patient	Home; Supermarket		2020-02-11	2020-02-13
		164	/	M		Y**	Possible source	(XiaMen, FuJian PR) Flight MF8039 (49C); Bus; Train D5383 (4-7A); Private car; Home; Supermarket; Restaurant		2020-02-09	2020-02-13
		165	/	M		N	Relative of Harbin-109	Private car; Home; Restaurant		2020-02-12	2020-02-13
		166	/	F		N	Relative of Harbin-58	Home dinner; Clinic; Old people's home	2020-02-09	2020-02-12	2020-02-13
	http://heb.bendibao.com/news/2020216/53509.shtm	167	/	F		N		Taxi; Bus; Home; Supermarket; Hair cut		2020-02-12	2020-02-14
		168	/	F		N	Relative of Harbin-106	Private car; Home; Restaurant		2020-02-13	2020-02-14
		169	/	F		N	Relative of Harbin-106	Private car; Taxi; Home; Restaurant		2020-02-13	2020-02-14
	http://heb.bendibao.com/news/2020217/53513.shtm	170	/	F		N	Relative of Harbin-105	Private car; Home; Restaurant		2020-02-12	2020-02-15
		171	/	F		N		Home		2020-02-14	2020-02-15
		172	/	F		N	Source	Home baby-sister; Pharmacy; Restaurant		2020-02-14	2020-02-15
		173	/	F		N	Relative of Harbin-106	Private car; Home; Restaurant		2020-02-14	2020-02-15
		174	/	F		N	Relative of Harbin-106	Home		2020-02-13	2020-02-15
		175	/	M		N	Relative of Harbin-32	Private car; Metro; Bus; Home; Pharmacy		2020-02-07	2020-02-15
		176	/	M		N	Relative of Harbin-41	Bus; Home		2020-02-14	2020-02-15
		177	/	F		N		Private car; Home; Restaurant		2020-02-13	2020-02-15
		178	/	M		N	Employer of Harbin-172	Home		2020-02-14	2020-02-15
		179	/	F		N	The same restaurant with Harbin-89	Home; Restaurant		2020-02-14	2020-02-15
		180	/	M		N		Private car; Home; Supermarket		2020-02-14	2020-02-15
		181	/	F		N	Relative of Harbin-139	Home dinner; Restaurant		2020-02-13	2020-02-15
		182	/	F		N	Might be contact with Harbin-133 (expressman)	Bus; Home; Pharmacy		2020-02-06	2020-02-15
		183	/	M		N	Relative of Harbin-164	Home; Restaurant		2020-02-12	2020-02-15
		184	/	M		N	Live in the same apartment with Harbin-166	Old people's home		2020-02-14	2020-02-15
	http://heb.bendibao.com/news/2020218/53534.shtm	185	/	F		N	Relative of Harbin-106	Private car; Home; Restaurant		2020-02-13	2020-02-16
		186	/	M		N	Relative of Harbin-33	Home		2020-02-15	2020-02-16
		187	/	M		N	Live in the same apartment with Harbin-166	Old people's home		2020-02-14	2020-02-16
		188	/	F		N	Live in the same apartment with Harbin-166	Old people's home		2020-02-14	2020-02-16
		189	/	M		N	Live in the same apartment with Harbin-166	Old people's home		2020-02-14	2020-02-16
		190	/	M		N		Bus; Metro; Home; Supermarket; ATM; Bank; Shop		2020-02-14	2020-02-16
	https://baijiahao.baidu.com/s?id=1658919509730731982&wfr=spider&for=pc	191	/	M		N	The same residential astate with Harbin-105	Home		2020-02-16	2020-02-17
		192	/	M		N	Relative of Harbin-105	Home		2020-02-16	2020-02-17
	https://www.sohu.com/a/374375392_99962390	193	/	M		N	Live in the same residential astate with Harbin-166	Home		2020-02-15	2020-02-18
		194	/	M		N				2020-02-13	2020-02-18
	https://www.sohu.com/a/374548734_115402	195	/	F		N	The same hospital with Harbin-196	Hospital		2020-02-17	2020-02-19
		196	/	F		N	Relative of Harbin-177	Hospital; Home		2020-02-16	2020-02-19
	http://heb.bendibao.com/news/2020221/53627.shtm	197	/	F		N	Relative of Harbin-178	Home		2020-02-17	2020-02-20
		198	/	F		N	Live in the same residential astate with Harbin-166	Home		2020-02-14	2020-02-20
		199	/	M		N	Relative of Harbin-198; Live in the same residential astate with Harbin-166	Home		2020-02-14	2020-02-20
	http://heb.bendibao.com/news/2020224/53647.shtm	200	/	M		N	The same residential astate with Harbin-105	Home		2020-02-20	2020-02-22
Suihua	https://mp.weixin.qq.com/s/H4ULC0DFJY0UyRnIcf60fA	1	/	F	69	N	Source	Home; Clinic		2020-01-17	2020-01-23
		2	/	M	69	N	Relative (Husband) of SuiHua-1	Home			2020-01-25
		3	/	F	51	N	Relative (1st daughter) of SuiHua-1	Taxi; Home; Clinic		2020-01-17	2020-01-26
		4	/	F	57	N	Relative (2nd little sister) of SuiHua-1	Home; Clinic		2020-01-17	2020-01-27
		5	/	F	45	N	Relative (2nd daughter) of SuiHua-1	Taxi; Private car; Home; Clinic		2020-01-23	2020-01-27
		6	/	F	67	N	Relative (1st little sister) of SuiHua-1	Home; Clinic			2020-01-27
		7	/	M	49	N	Relative (son) of SuiHua-1	Taxi; Home			2020-01-27
		8	/	F	45	N	Relative (son's wife) of SuiHua-1	Taxi; Home; Clinic			2020-01-27
		9	/	F	67	N	Source	Home		2020-01-21	2020-01-28
		10	/	F	75	N	Relative (fathter) of SuiHua-14	Home		2020-01-28	2020-01-28
		11	/	M	67	N	Source	Home; Pharmacy		2020-01-29	2020-01-30
		12	/	F	75	N	The same hospital department with SuiHua-9	Home		2020-01-22	2020-01-30
		13	/	F	36	N	Relative (son's wife) with SuiHua-11	Home; Clinic; Pharmacy		2020-01-19	2020-01-30
		14	/	F	47	Y**	Source; Relative (1st daughter) of SuiHua-10	(TianJin) Train G373 (12); Private car; Home		2020-01-28	2020-02-01
		15	/	M	67	N	The same residential estate with SuiHua-1	Home		2020-01-31	2020-02-01
		16	/	F	58	N	Relative (might be wife) of SuiHua-11	Home		2020-01-16	2020-02-03
		17	/	F	22	N	Contact with SuiHua-9	Taxi; Home			2020-02-03
		18	/	M	43	N	Relative (son) of SuiHua-9	Home		2020-01-21	2020-02-01
		19	/	M	73	Y**		(BeiJing) Train K339; Taxi; Home		2020-02-01	2020-02-02
		20	/	F	32	N	Source	Home; Restaurant		2020-02-02	2020-02-03
		21	/	M	48	Y**	Source	(BaoTou, Inner Mongolia Autonomous Region; HangZhou, ZheJiang PR; YangZhou, JiangSu PR) Flight 3U8582; Private car; Home; Supermarket; Restaurant; Fruit market		2020-01-29	2020-02-04
		22	/	F	35	N	Relative (old brother's son) of SuiHua-21	Private car; Home		2020-02-02	2020-02-04
		23	/	M	44	N	The same mall with Harbin-20	Home; Carrefour supermarket; SPA; KFC		2020-01-28	2020-02-03
	http://sjdb.hljnews.cn/news/147326.html	24	/	F	32	N	Friend of SuiHua-20	Home; Restaurant			2020-02-03
		25	/	M	46	N	Escort in the same hospital department with SuiHua-9	Home; Private car		2020-02-03	2020-02-05
		26	/	M	28	N	Contact with SuiHua-11	Home			2020-02-04
		27	/	M	58	N	Relative (old brother) of SuiHua-21	Home; Supermarket; Clinic			2020-02-04
		28	/	F	86	N	Relative (mother) of SuiHua-21	Private car; Home			2020-02-05
	https://www.sohu.com/a/371317686_99962390	29	/	M	43	Y**	Take car with Harbin-155	(GuangZhou, GuangDong PR) Train Z236 (4-9 middle bed in sleeping car); Bus; Private car; Taxi; Home; Restaurant		1900-01-30	2020-02-06
		30	/	M	47	N	Play Poker with SuiHua-49	Home; Clinic	1900-01-26	2020-02-04	2020-02-06
		31	/	M	51	N	Relative of SuiHua-50	Attend wedding in YanBian, JiLin PR; Taxi; Home; Supermarket		2020-02-04	2020-02-06
		32	/	F	63	N	Source	Taxi; Home		2020-02-04	2020-02-06
		33	/	F	51	N	Relative (little sister) of SuiHua-32	Taxi; Private car; Home; Supermarket		2020-01-30	2020-02-06
		34	/	F	21	Y**		(DaLian, LiaoNing PR) Private car; Home; Supermarket		2020-02-02	2020-02-06
		35	/	M	63	N	Contact with SuiHua-23 in Hospital department	Home; Hospital			2020-02-06
		36	/	M	56	N	Doctor of SuiHua-23 in Hospital department	Home; Hospital			2020-02-06
		37	/	F	44	N	Doctor of SuiHua-23 in Hospital	Home			2020-02-06
		38	/	F	31	N	Doctor of SuiHua-23 in Hospital	Home			2020-02-06
	https://m.dbw.cn/heilongjiang/system/2020/02/09/058336981.shtml	39	/	M	54	N	Relative (brother) of Harbin-20	Home			2020-02-07
		40	/	M	42	Y**		(SanYa, HaiNan PR; HangZhou, ZheJiang PR) Flight CZ6360, HO1815; Private car; Home		2020-02-05	2020-02-07
		41	/	M	56	N	Relative (2nd little brother) of SuiHua-32	Taxi; Private car; Home; Supermarket		2020-01-30	2020-02-07
		42	/	F	24	N		Home; Private car; Hospital			2020-02-07
	https://www.sohu.com/a/371750416_99962390	43	/	F	37	Y**	Relative (daughter) of SuiHua-32	(NanNing, GuangXi PR) Flight QW6042, CZ6248; Taxi; Home		2020-02-02	2020-02-09
		44	/	M	67	N	Relative (cousin) of SuiHua-32	Home; Supermarket			2020-02-09
	https://m.sohu.com/a/372295185_100200311/	45	/	F	42	N	Relative (little daughter) of SuiHua-10	Taxi; Bus; Private car; Home			2020-02-10
		46	/	M	60	N	Relative (1st little brother) of SuiHua-32	Home			2020-02-10
	http://www.hlwangkui.gov.cn/wap/yqfkzl/111847	47	/	M	45	Y**	Relative (son) of SuiHua-11	(BeiJing) Taxi; Train K266 (4), G371 (10); Taxi; Company; Private car; Home		2020-01-20	2020-02-11
		48	/	F	76	N		Taxi; Private car; Home		2020-01-18	2020-02-11
		49	/	M	58	N*	Son is a patient in DeZhou, ShanDongPR	Home			2020-02-11
		50	/	F	57	N*	Son is a patient in DeZhou, ShanDongPR; Relative (wife) of SuiHua-49	Home			2020-02-11
	https://baijiahao.baidu.com/s?id=1658433142614803311&wfr=spider&for=pc	51	/	M	23	N	Relative (son) of SuiHua-30	Home		2020-02-09	2020-02-12
		52	/	M	44	N		Taxi; Private car; Home; SPA; Clinic		2020-02-02	2020-02-12
	https://baijiahao.baidu.com/s?id=1659008852893218681&wfr=spider&for=pc	53	/	F	72	N		Home	2020-02-15	2020-02-16	2020-02-18
Shuangyashan	https://new.qq.com/omn/20200216/20200216A0FL7W00	1	/	F	24	Y		Train T182 (16-5,upper bed in sleeping car), D7815 (7-3D); Bus; Taxi; Home		2020-01-24
		2	/	F	55	Y		Train T182 (15-72), K7017 (15-23); Taxi; Home; Clinic		2020-01-23
		3	/	F	53	Y		Train G1278 (8-4C,3A,4B), K7017 (15-53,54,49); Taxi; Home		2020-01-24
		4	/	F	32	N	Relative (daughter) of ShuangYaShan-11	Train K7205 (11-88); Supermarket; Pharmacy		2020-02-02
		5	/	M	39	N	Source	Home; Clinic		2020-01-31
		6	/	F	38	N	Source	Home; Fruit market (BaoSheng; BaiGuoYuan); Pharmacy		2020-01-31
		7	/	M	37	Y**	Source	(ShangHai) Flight Y87533, SC2153; Train K7113 (1); Home		2020-02-01
		8	/	M	54	N	Relative (father's 2nd little brother) of ShuangYaShan-7	Home; Fruit market (BaoSheng)		2020-02-02
		9	/	F	52	N	Relative (2nd little sister) of ShuangYaShan-11	Home		2020-02-02
		10	/	F	62	N	Relative (old sister) of ShuangYaShan-11	Home; Fruit market (BaoSheng; BaiGuoYuan)		2020-02-02
		11	/	F	55	N	Source	Home; Fruit market (BaoSheng; BaiGuoYuan); Clinic		2020-02-02
		12	/	M	65	N	Relative (father) of ShuangYaShan-7	Home; Fruit market (BaoSheng; HeShengLong); Clinic		2020-02-01
		13	/	F	66	N	Relative (mother) of ShuangYaShan-5	Home		2020-02-01
		14	/	M	67	N	Relative (father) of ShuangYaShan-5	Home		2020-02-01
		15	/	F	63	N	Relative (mother) of ShuangYaShan-7	Home; Fruit market (BaoSheng; HeShengLong)		2020-02-01
		16	/	M	59	N	Relative (mother's little brother) of ShuangYaShan-7	Home; Fruit market (BaoSheng; BaiGuoYuan); Pharmacy		2020-02-01
		17	/	M	37	N	Relative (Husband) of ShuangYaShan-6	Home; Fruit market (BaoSheng; BaiGuoYuan)		2020-01-31
		18	/	F	58	N	The same fruit marke with ShuangYaShan-11	Fruit market (BaoSheng); Clinic		2020-01-27
		19	/	F	78	N	Relative (mother) of ShuangYaShan-11	Home		2020-02-02
		20	/	M	54	N	Relative (2nd-little sister's husband) of ShuangYaShan-11	Home	2020-02-01	2020-02-02
		21	/	F	55	N	The same fruit marke with ShuangYaShan-11	Home; Fruit market (BaoSheng; BaiGuoYuan)		2020-02-03
		22	/	F	64	Y**	Relative (wife's mother) of ShuangYaShan-7	(ShangHai) Flight HO1137 (5E,5F); Train K7017 (10), K7113 (1); Home; Fruit market; Pharmacy		2020-02-03
		23	/	F	25	Y**	Relative of ShuangYaShan-21	(ShangHai) Train Z172, K7205; Home	2020-02-02	2020-02-02
		24	/	F	13	Y**	Relative of ShuangYaShan-21	(BeiJing) Private car; Home		2020-02-03
		25	/	M	87	N	Relative (father) of ShuangYaShan-11	Home		2020-02-02
		26	/	F	67	N	Relative (wife) of ShuangYaShan-30	Home; Fruit market (BaoSheng; BaiGuoYuan; HeShengLong)	2020-02-02	2020-02-03
		27	/	M	29	N	Relative (son) of ShuangYaShan-19	Home; Fruit market (BaoSheng; BaiGuoYuan); Hospital	2020-02-01	2020-02-03
		28	/	F	6	N	Relative (3rd-daughter's daughter) of ShuangYaShan-30	Home		2020-02-03
		29	/	M	39	N	Relative (3rd-daughter's husband) of ShuangYaShan-30	Train 4134; Home; Supermarket		2020-02-03
		30	/	M	67	N	Source	Home; Fruit market (BaoSheng)		2020-02-03
		31	/	F	45	N	Relative (1st-daughter) of ShuangYaShan-30	Train G771; Taxi; Home		2020-02-02
		32	/	M	62	N	Relative (father) of ShuangYaShan-6	Home; Supermarket		2020-02-03
		33	/	F	42	N	Relative (2nd-daughter) of ShuangYaShan-30	Train D7823; Flight CA1983; Fruit market (BaoSheng; BaiGuoYuan); Taxi; Home		2020-02-02
		34	/	F	37	N	Relative (3rd-daughter) of ShuangYaShan-30	Home; Fruit market (BaoSheng)		2020-02-03
		35	/	M	57	N	Relative (husband) of ShuangYaShan-11	Home; Clinic		2020-01-31
		36	/	M	57	N	Relative (old brother) of ShuangYaShan-11	Taxi; Home		2020-02-03
		37	/	M	50	N	The same fruit marke with ShuangYaShan-30	Fruit market (BaoSheng; HeShengLong); Taxi; Restaurant		2020-02-04	2020-02-08
		38	/	F		N		Home; Supermarket; Pharmacy		2020-01-28	2020-02-08
		39	/	M		N	Might contact with ShuangYaShan-37	Taxi; Home		2020-02-08	2020-02-12
		40	/			N	The same fruit marke with ShuangYaShan-11	Private car; Fruit market (BaoSheng; BaiGuoYuan); Home		2020-02-04	2020-02-13
		41	/			N	Relative of ShuangYaShan-40	Home		2020-02-07	2020-02-13
		42	/			N	Relative (might be parent) of ShuangYaShan-22	Home		2020-02-04	2020-02-13
		43	/			N	Staff in the same fruit marke with ShuangYaShan-11	Staff in fruit market (BaoSheng); Home		2020-02-05	2020-02-13
		44	/			N	The same fruit marke with ShuangYaShan-11	Home; Fruit market (BaoSheng; HeShengLong);		2020-02-04	2020-02-13
		45	/	F		N	Relative (sister) of ShuangYaShan-21	Home	2020-02-04	2020-02-04	2020-02-13
		46	/	F		N		Home		2020-02-06	2020-02-13
		47	/	M		N	Relative (husband) of ShuangYaShan-45	Home	2020-02-04	2020-02-04	2020-02-13
		48	/	F		N	Relative of ShuangYaShan-38	Home; Supermarket		2020-02-08	2020-02-13
		49	/			Y**	Relative of ShuangYaShan-21	Home; Fruit market (BaoSheng; BaiGuoYuan)	2020-02-12	2020-02-13	2020-02-15
	https://new.qq.com/omn/20200218/20200218A04CWW00.html	50	/	F		N	The same fruit marke with ShuangYaShan-11	Home; Fruit market (BaoSheng)		2020-02-14	2020-02-16
	https://news.sina.cn/gn/2020-02-18/detail-iimxxstf2499249.d.html?ivk_sa=1023197a	51	/			N	Relative of ShuangYaShan-21	Home		2020-02-15	2020-02-17
		52	/	F		N	Relative (wife) of ShuangYaShan-5	Home; Private car		2020-02-14	2020-02-17
Jixi	http://2015.jixi.gov.cn/syzwyw_2778/	1	/	M	24	Y	Source	Train Z38 (4-15, midle bed in sleeping car), G393 (14-10B); K39 (1-40); Metro; Home; Supermall; Taxi; Poker Room		2020-01-26	2020-01-28
		2	/			N	The same train with JiXi-1	Train K39 (1-34); Taxi; Home		2020-01-18
		3	/	F		Y**	The same train with JiXi-1	(BeiJing) Train K39 (1-18,19,20); Taxi; Bus; Home; Fruit market
		4	/			Y	Possible source	Private car; Hotel	2020-01-27	2020-01-30
		5	/	F		N	Source	Home		2020-02-01
		6	/			N	Relative (father) of JiXi-34	Taxi; Home		2020-01-29
		7	/	M		Y	Possible source; The same trip to JiXi-4	Home			2020-02-03
		8	/	F		Y	Possible source; The same trip to JiXi-4	Home			2020-02-03
		9	/	F		N	Relative (mother) of JiXi-5	Taxi; Private car; Home	2020-01-30	2020-01-30
		10	/	M		N		Home
		11	/			N	Relative of JiXi-12	Home
		12	/			Y**	Possible source	(HangZhou, ZheJiang PR) Train Z176 (9-no seat), K7075 (9-6,upper bed in sleeping car); Bus; Metro; Hotel; Taxi; Home; Supermarket		2020-02-03
		13	/	M		N	Relative of JiXi-12	Home
		14	/			N	Relative of JiXi-21	Private car; Home; Supermarket; Clinic; Fruit market; Sea food market	2020-01-23	2020-02-03
		15	/	M		N	Relative (husband) of JiXi-5	Home		2020-02-01
		16	/	F		N		Bus; Home; Supermarket; Clinic		2020-02-01
		17	/	M		N	Relative of Harbin-122	Bus; Home		2020-02-03
		18	/	M		N	Relative (father) of JiXi-5	Private car; Bus; Home; Supermarket
		19	/	M		N	Customer of JiXi-5 in restaurant	Train G4129; Bus; TaxiHome; Supermarket
		20	/	F		N	Relative of JiXi-19	Taxi; Private car; Home; Restaurant		2020-02-05
		21	/	F		Y**	Source	(TianJin) Train K39 (11); Taxi; Private car; Home		2020-01-31
		22	/	F		N	Relative of JiXi-21	Taxi; Home; Fruit market		2020-02-04
		23	/	F		N	Relative (father's mother) of JiXi-37	Taxi; Home; Supermarket; Clinic		2020-02-05
		24	/	M		N	Relative (father's father) of JiXi-37	Taxi; Home; Supermarket		2020-02-05
		25	/	M		N	Relative (father) of JiXi-20	Home
		26	/	M		N	Relative (father) of JiXi-17	Home		2020-02-06
		27	/	F		N	Relative (mother) of JiXi-17	Home; Supermarket		2020-02-06
		28	/	M		N	Relative (father's father) of JiXi-14	Private car; Home
		29	/	F		N	Relative (father's mother) of JiXi-14	Private car; Home
		30	/	F		Y**	Possible source; Relative (girl friend) of JiXi-12	(Thailand; QingDao, ShanDong PR) Flight; Taxi; Train G1208, K7075 (9-5,lower bed in sleeping car); Hotel; Bus; Home; SPA; Restaurant
		31	/	F		N	Relative (mother's mother) of JiXi-37	Home; Pharmacy
		32	/	F		N	Relative (father's little sister) of JiXi-20	Train K7110 (2-3072), K7137 (8-51); Taxi; Home; Supermarket; Pharmacy		2020-02-07
		33	/	F		N	Relative (father's little sister) of JiXi-34	Taxi; Home
		34	/	M		Y**	Source	(XiAn, ShaanXi PR; BeiJing) Train G26 (4-7F), D27 (9-14A), T261 (5-3,lower bed in sleeping car); Metro; Taxi; Internet bar; Home; SPA; Restaurant
		35	/	M		N	Relative (mother's father) of JiXi-37	Home		2020-02-07
		36	/	M		N	Relative (father) of JiXi-37	Bus; Taxi; Home; Supermarket; Pharmacy; Restaurant
		37	/	F		Y**	Source	(ShanDong PR) Train D904 (3-4A), G77 (16-4B); Ship; Bus; Taxi; Home; Pharmacy; Shop; Restaurant
		38	/	F		N	Relative (mother) of JiXi-37	Taxi; Bus; Home; Supermarket; Fruit market; Pharmacy; Restaurant		2020-02-06
		39	/	F		N	Relative (mother's little sister) of JiXi-5	Home dinner
		40	/	F		N	Relative (old sister) of JiXi-17	Taxi; Home; Market; Pharmacy; Fruit market
		41	/	F		N	Relative (father's little brother's wife) of JiXi-20	Home
		42	/	M		N	Relative (father) of Harbin-104	Taxi; Home; Restaurant		2020-02-08
		43	/	F		N	Possible source; Friend of JiXi-46	Private car; Home; Supermarket		2020-02-08
		44	/	F		N	Friend of JiXi-20	Home		2020-02-09
		45	/	M		N	Relative (father's little brother) of JiXi-20; Relative (old brother) of JiXi-32; Relative (husband) of JiXi-41	Home
		46	/	F		N	Possible source; Friend of JiXi-43	Home; Supermarket; Restaurant		2020-02-08
		47	/	M		N	Relative (mother's mother) of Harbin-104	Home		2020-02-08
		48	/	M		N		Private car; Home; Supermarket; Restaurant		2020-02-13
		49	/	M		N	Relative (husband's father) of JiXi-44	Home
Qiqihar	http://hlj.sina.com.cn/news/ljyw/2020-02-09/detail-iimxyqvz1486000.shtml?cre=tianyi	1	/	F	47
		2	/
		3	/
		4	/	M	22	Y**	Possible source; The same residential estate with Harbin-34	(Bangkok, Thailand; TianJin) Flight CA1678, CA750, CA749; Taxi; Train D6917 (15-1F); Home; Restaurant		2020-01-03
		5	/	M	49	N	Relative (father) of Qiqihar-4	Private car; Restaurant; Home
		6	/	F	48	N	Relative (mother) of Qiqihar-4	Restaurant; Home		1900-01-28
		7	/	M	87	N	Relative (grandpa) of Qiqihar-4	Home
		8	/	F	55	N	Relative (1st aunt) of Qiqihar-4	Restaurant; Home
		9	/	F	51	N	Relative (2nd aunt) of Qiqihar-4	Restaurant; Home
		10	/	F	47	N	Source	Home dinner; Restaurant	1900-01-28	1900-01-30
		11	/	M	49	N	Relative (old brother) of Qiqihar-10	Home dinner
		12	/	F	71	N	Relative (mother) of Qiqihar-10	Home dinner
		13	/	M	4	N	Relative (little brother) of Qiqihar-10	Home dinner
		14	/	F	21	N	Relative (daughter) of Qiqihar-10	Home dinner
		15	/	F	78	N	The same department in hospital with Qiqihar-12	Hospital	2020-02-03
		16	/	F	80	N	The same department in hospital with Qiqihar-12	Hospital	2020-02-03
		17	/	F	72	N	The same department in hospital with Qiqihar-12	Hospital	2020-02-02
		18	/	F	32	N	Nurse in the hospital department of Qiqihar-12	Hospital	1900-01-28
		19	/	F	38	Y**	Relative (might be daughter in law) of Qiqihar-7	(ShenYang, LiaoNing PR) Private car; Train Z157 (11-7), K1303 (7-no seat), K927 (3-4,lower bed in sleeping car)		2020-02-01
		20	/	M	32	N*	Contact with a relative in Harbin	Private car; Train D6918 (2-12A), G765 (5-2F); Taxi; Home dinner
		21	/	M	42	N		Bus; Home; Hospital	1900-01-24	2020-01-28
		22	/	M	49	Y**	Escort in the same hospital with Qiqihar-12	(PanJin, LiaoNing PR) Restaurant; Hotel; Hotspital	2020-02-01	2020-02-01
		23	/	F	68	N	The same department in hospital with Qiqihar-12		2020-02-03
		24	/	M	61	N	The same department in hospital with Qiqihar-12		2020-02-03
		25	/	M	46	N	Escort in the same department in hospital with Qiqihar-12	Taxi; Home; Supermarket
		26	/	M	64	N	Escort in the same department in hospital with Qiqihar-12	Taxi; Home
		27	/	M		N	Might be relative (little brother) of Qiqihar-22	Private car; Home			2020-02-06
		28	/	M		N	The same department in hospital with Qiqihar-12	Private car; Home
		29	/	F		N		Private car; Home; Supermarket		2020-02-04
		30	/	M		N	Escort in the same department in hospital with Qiqihar-12	Bus; Train K295; Private car; Home
		31	/	M		N	Relative of Qiqihar-4	Home dinner; Restaurant		2020-02-06
		32	/	M		N	Escort in the same department in hospital with Qiqihar-12	Private car; Home		2020-01-17
		33	/	F	55	N	Escort in the same department in hospital with Qiqihar-12	Home; Hospital
		34	/	M		N	The same residential estate with Qiqihar-5; Daughter is from ShenYang, LiaoNing PR	Taxi; Home; Restaurant	2020-02-07	2020-02-07
		35	/	M		N	Relative (son) of Qiqihar-16	Home; Pharmacy; Hospital		2020-01-29
		36	/	F		N	The same apartment with Qiqihar-34; Same department in hospital with Qiqihar-12	Taxi; Private car; Home	2020-02-12	2020-02-05
		37	/	F		N	The same apartment with Qiqihar-34	Private car; Home		2020-02-13
		38	/	F		N	Escort in the same residential estate with Qiqihar-34; Same department in hospital with Qiqihar-12	Home		2020-02-14
		39	/	M		N		Home; Pharmacy		2020-02-12
		40	/	F		N	Relative (wife) of Qiqihar-39	Home; Pharmacy		2020-02-12
		41	/	F		Y**	Relative (daughter) of Qiqihar-34	(ShenYang, LiaoNing PR) Home
		42	/	F		N	Relative (granddaughter) of Qiqihar-34	Home
		43	/	F		N			2020-02-12	2020-02-15	2020-02-17
Daqing	http://m.39yst.com/area/yiqing/544652.shtml	1	/	F		Y	Source	Flight CZ6317; Home; Restaurant		2020-01-22	2020-01-23
		2	/	F		N	Relative (1st daughter) of DaQing-1	Home; Restaurant		2020-01-22	2020-01-25
		3	/	F		N	Relative (little sister) of DaQing-1	Home; Restaurant		2020-01-23	2020-01-25
		4	/	M		N	Relative (husband) of DaQing-1	Home		2020-01-22	2020-01-26
		5	/	F		N	Relative (2nd daughter) of DaQing-1	Home; Restaurant			2020-01-31
		6	/	M		N	Relative (1st daughter's husband) of DaQing-1	Home; Restaurant			2020-02-02
		7	/			Y	Source	Flight CA8225; Train D9162 (2), D7907 (7); Supermall; Taxi; Private car; Home; Supermarket; Restaurant		2020-01-28	2020-01-30
		8	/	F		N	Relative (mother) of DaQing-7	Private car; Home; Restaurant		2020-01-28	2020-01-30
		9	/	M		N	Relative (father) of DaQing-7	Home; Supermarket; Restaurant		2020-01-30	2020-02-02
		10	/			Y		Train G1278 (12-4D), D6907(12-7F); Taxi; Hotel; Private car; Home		2020-01-22	2020-01-26
		11	/			Y**	Source	(NanChang, JiangXi PR) Train Z104 (9-13,14,lower beds in sleeping car); Bus; Taxi; Private car; Supermall; Home		2020-01-27	2020-02-02
	http://www.daqing.gov.cn/zfgz/zfgg/652994.shtml	12	/	F		N	Relative (3rd daughter) of DaQing-1	Bus; Private car; Home		2020-01-30	2020-02-05
		13	/	M		N	Relative (grandpa) of DaQing-7	Home		2020-01-29	2020-02-05
	http://www.daqing.gov.cn/zfgz/zfgg/653226.shtml	14	/	F		N	Relative of DaQing-7	Private car; Bus; Home; Shop		2020-01-21	2020-02-10
	http://www.daqing.gov.cn/zfgz/zfgg/653239.shtml	15	/	F		N	Hospital staff of DaQing-1	Hospital staff; Supermarket; SPA		2020-02-01	2020-02-11
	http://www.daqing.gov.cn/zfgz/zfgg/653381.shtml	16	/	F		N	Relative of DaQing-7	Home	2020-02-09		2020-02-13
		17	/	M		N	Relative of DaQing-7	Home; Supermarket; Pharmacy; Restaurant	2020-02-09		2020-02-13
		18	/	M		Y**	The same train with Harbin-32	(BeiJing) Train Z204 (1-21, lower bed in sleeping car), T47 (9-32, upper bed in sleeping car); Taxi; Private car; Home	2020-02-01	2020-02-08	2020-02-13
	http://www.daqing.gov.cn/zfgz/zfgg/653430.shtml	19	/	M		N	Relative of DaQing-7	Home dinner; Restaurant	2020-02-08	2020-02-11	2020-02-14
	http://www.daqing.gov.cn/zfgz/zfgg/653548.shtml	20	/	F		N	Relative of DaQing-11	Home			2020-02-16
	http://www.daqing.gov.cn/zfgz/zfgg/653679.shtml	21	/	F		N	The same apartment with DaQing-19	Home		2020-02-17	2020-02-18
		22	/	M		N	Relative of DaQing-21	Home; Supermarket; Shop; Office		2020-02-15	2020-02-18
		23	/	M		N	Relative of DaQing-19	Home	2020-02-13	2020-02-13	2020-02-18
	http://www.daqing.gov.cn/zfgz/zfgg/653743.shtml	24	/	F		N	Relative of DaQing-19	Home			2020-02-19
		25	/	F		N	Relative of DaQing-21	Home			2020-02-19
		26	/	M		N		Hospital in Qiqihar; Private car			2020-02-19
Qitaihe	https://www.sohu.com/a/373084269_100200306	1	/	M	33	Y	Source	Train T182 (11-1), D7825 (2-no seat); Taxi; Private car; Home; Supermarket		2020-01-25
		2	/	M	47	N*	Source; Have dinner with people from WuHan	Home; Restaurant	1900-01-26	2020-01-26
		3	/	M	46	N	Friend of QiTaiHe-2	Play Mahjong with QiTaiHe-2	1900-01-28	2020-01-28
		4	/	M	57	N	Relative (father) of QiTaiHe-1	Home
		5	/	M	55	Y**	Friend of QiTaiHe-2	(DanDong, LiaoNing PR) Play Mahjong with QiTaiHe-2; Hotel; Private car; Home	1900-01-29	2020-01-29
		6	/	F	54	Y**	Relative (wife) of QiTaiHe-5	(DanDong, LiaoNing PR) Hotel; Private car; Home	1900-01-31
		7	/	F	56	N	Relative (mother) of QiTaiHe-1	Home	2020-02-01
		8	/	M	32	N	Friend of QiTaiHe-2; Maybe his father plays Mahjong with QiTaiHe-2	Home; Private car; Taxi; SPA	1900-01-28	2020-01-28
		9	/	M	31	N	Friend of QiTaiHe-8	Private car; Home; Supermarket; SPA; Restaurant	2020-02-03	2020-02-03
		10	/	M	31	N	Friend of QiTaiHe-8	Train D5320 (6-5F), G2602 (5-3F), G1275 (14-14B), K7284 (11-2), K7282 (+3-3 lower bed in sleeping car); Private car; Metro; Hotel; Taxi; Bus; Home; SPA			2020-02-06
		11	/	F	49	N	Source	Taxi; Private car; Home; Supermarket		2020-02-04	2020-02-07
		12	/	F	67	N	Friend of QiTaiHe-11	Private car; Home		2020-02-02	2020-02-08
		13	/	F	67	N	The same residential estate with QiTaiHe-14	Home; Supermarket	2020-02-04	2020-02-04	2020-02-08
		14	/	F	54	N	Friend of QiTaiHe-11	Home		2020-02-05	2020-02-09
		15	/	F	55	N		Private car; Home; Restaurant	1900-01-31	2020-02-03	2020-02-10
		16	/	M	65	N	Relative (husband) of QiTaiHe-13	Home	2020-02-04	2020-02-05	2020-02-12
	https://baijiahao.baidu.com/s?id=1658973242319854758&wfr=spider&for=pc	17	/	F	68	N			2020-02-16	2020-02-16	2020-02-17
Mudanjiang	http://sjdb.hljnews.cn/news/148140.html	1	/	M	69	Y			2020-01-12	1900-01-12
		2	/			Y		Train T182 (14), D8511 (3); Bus; Home
		3	/			N	Relative (old brother) of MuDanJiang-5	Private car; Bus; Restaurant; Shop; Market
		4	/	F		N	Relative (mother) of MuDanJiang-5	Bus; Restaurant; Shop; Market
		5	/	F		N	Source	Bus; Restaurant; Supermall; Supermarket
		6	/			N	Relative of MuDanJiang-5	Sea food shop; Shop;
		7	/	M	32	Y**	Possible source	(ZhuHai; GuangDong PR) Flight ZH8309; Train D8525 (6, dinner car); Bus; Hotel; Taxi; Home; Restaurant		2020-01-31	2020-02-01
		8	/	M	63	Y**	Possible source; The same travel group to MuDanJiang-7	(TaiAn, ShanDong PR) Train K1450 (15-19,20,22 Lower bed in sleeping car), D8511 (6), K1452 (12-8,upper,middle,lower beds in sleeping car); Hotel; Taxi; Bus; Home; Restaurant		2020-01-29	2020-02-02
		9	/	F	64	Y**	Possible source; Relative (wife) of MuDanJiang-8	(TaiAn, ShanDong PR) Train K1450 (15-19,20,22 Lower bed in sleeping car), D8511 (6), K1452 (12-8,upper,middle,lower beds in sleeping car); Hotel; Taxi; Bus; Home; Restaurant		2020-01-30	2020-02-04
		10	/	F	59	N	The same residential estate with Harbin-97	Taxi; Home		2020-02-03	2020-02-05
		11	/	M	25	Y**	Possible source; Relative (girl friend) of MuDanJiang-7	(ZhuHai; GuangDong PR) Flight ZH8309; Train D8525; Bus; Home; Restaurant		2020-02-06	2020-02-06
		12	/	F	88	N	Relative (mother) of MuDanJiang-8	Home dinner	2020-02-05	2020-02-05	2020-02-07
		13	/	F	62	N	Relative (1st little sister) of MuDanJiang-8	Bus; Taxi; Home dinner; Pharmacy	2020-02-05	2020-02-05	2020-02-07
		14	/	F	58	N	Relative (2nd little sister) of MuDanJiang-8	Taxi; Private car; Home dinner; Pharmacy; Shop		2020-01-30	2020-02-07
	https://3g.163.com/news/article/F5M2JF8A0523SV73.html	15	/	M	64	N	Relative of MuDanJiang-5	Home		2020-02-15	2020-02-17
	http://www.39yst.com/area/yiqing/548528.shtml	16	/	M	57	N	The same residential estate with Qiqihar-5	Home	2020-02-17	2020-02-17	2020-02-19
	http://hlj.ifeng.com/a/20200305/11215967_0.shtml	17	/	M	43	N	Friend of MuDanJiang-16	Home dinner			2020-03-04
Jiamusi	https://baijiahao.baidu.com/s?id=1658135152572975192&wfr=spider&for=pc	1	/	M		Y	Possible source; The same trip to JiaMuSi-5	Flight 8L9891 (6F), CA8943 (19A); Private car; Home		2020-01-25
		2	/	M		Y	Possible source	Train T182 (3;17-12,lower bed in sleeping car), D7831 (4); Private car; Home; Supermarket; Clinic; Restaurant		2024-01-20
		3	/	F		Y	Possible source; Relative (wife) of JiaMuSi-2	Train T182 (3;17), D7831 (2); Private car; Supermarket; Clinic; Restaurant		2020-01-19
		4	/	M		Y	Possible source; Relative (son) of JiaMuSi-2	Train T182 (3;17), D7831 (4); Taxi; Restaurant; Home		2020-01-22
		5	/	F		Y	Possible source; Relative (daughter) of JiaMuSi-2	Flight 8L9891 (18A), CA8943 (23L); Private car; Home		2020-01-31
		6	/	F		Y	Possible source	Train T182 (16), D131 (2); Cosmetic theater; Private car; Home dinner; Clinic		2020-01-26
		7	/	F		Y	Possible source; Relative (old sister) of JiaMuSi-6	Train T182 (16), D131 (2); Bus; Taxi; Home dinner		2020-01-28
		8	/	M		Y	Possible source; Relative (little brother) of JiaMuSi-6	Private car; Gym; Home		2020-01-16
		9	/	F		Y	Possible source; The same flight with ShenYang-3	Flight CZ3696, HU7789; Train C1209, G727, K1227 (+1), K5167 (12-no seat)		2020-01-25
		10	/	M		Y	Possible source; Relative (son) of JiaMuSi-9	Flight CZ3695; Train C1214, D119 (1-8F), D7811 (8-8F); Bus; Internet bar		2020-01-27
		11	/	M		N	Relative (little brother) of JiaMuSi-9	Home dinner		2020-01-26
		12	/	M		N	Relative (father) of JiaMuSi-9	Home dinner		2020-01-26
		13	/	M		N*	Contact with people from WuHan			2020-01-27
		14	/	F		N*	Contact with SuiHua-52	Train D7805 (6-3D); Taxi; Private car; Bus; Home; Supermarket; Restaurant; Clinic		2020-02-02
	http://sjdb.hljnews.cn/news/149134.html	15	/			Y	Possible source; The same trip to JiaMuSi-5	Flight 8L9891 (18B), CA8943 (23K); Private car; Home
Heihe	http://hlj.sina.cn/news/haerbin/2020-02-09/detail-iimxxstf0079166.d.html?from=wap	1	/	M	33	N					2020-01-31
	https://baijiahao.baidu.com/s?id=1658135152572975192&wfr=spider&for=pc	2	/	M	55	N	Source	Home; Private car; Restaurant; Supermarket	1900-01-27
		3	/	F	52	N	Relative (wife's little sister) of HeiHe-2	Home; Shop; Clinic
		4	/	M	84	N	Relative (wife's father) of HeiHe-2	Home
	http://www.heihe.gov.cn/info/1396/104701.htm	5	/	F	58	N	Relative of HeiHe-2	Home; Shop; Market		2020-02-07
		6	/	F	50	N	Relative of HeiHe-2	Home; Shop; Supermarket; Restaurant; Mall		2020-02-04
	http://hlj.sina.cn/news/haerbin/2020-02-09/detail-iimxxstf0079166.d.html?from=wap	7	/	M	48	N	Escort in the same department in hospital with Qiqihar-12	Home; Supermarket; Fruit market
		8	/	F	47	N	Relative (wife) of HeiHe-7	Home; Fruit market
		9	/	M	56	N	Relative (old sister's husband) of HeiHe-7	Home; Restaurant		2020-02-11
		10	/	F	53	N	Relative (old sister) of HeiHe-7	Home; Restaurant
	https://www.sohu.com/a/373192104_100200300	11	/	M	32	N	Relative of HeiHe-7	Home; Shop; Private car
		12	/	F	31	N	Relative of HeiHe-7; Relative (wife) of HeiHe-11	Private car; Home; Shop; Pharmacy
		13	/	M	9	N	Relative of HeiHe-7; Relative (son) of HeiHe-11	Private car; Home
	https://baijiahao.baidu.com/s?id=1658806664696391348&wfr=spider&for=pc	14	/	M	66	N	The same residential estate with HeiHe-7	Home; Restaurant		2020-02-13
Hegang	https://xw.qq.com/cmsid/20200214A0MF0F00?f=newdc	1	/	F	27	Y		Flight MU2517, MU5611; Train D131 (8); Bus; Private car; Home		2020-01-15	2020-01-29
		2	/	F		Y		Train T182 (5-no seat; 17-7), D7831 (4-5, no seat); Taxi		2020-01-31
		3	/	M		Y**		(BeiJing) Train G4785 (13-1D); D7821 (5-3D); Bus; Taxi; Home		2020-01-27	2020-02-07
		4	/	M		N	Father of HeGang-3	Taxi; Home		2020-02-05	2020-02-08
		5	/	M		Y**		(BeiJing) Train K349 (5-33, upper bed in sleeping car); Home; Supermarket; Hair cut; SPA		2020-01-30	2020-02-09
Da Hinggan Ling Prefecture	https://www.sohu.com/a/369797460_99962390	1	/			Y		Flight CZ6278 (44A); Train 6245 (4-66), D6905 (10-11D), K4793 (15-73); Home		2020-01-27	1900-01-29
		2	/			Y					1900-01-29
Yichun	https://baijiahao.baidu.com/s?id=1658520382538238229&wfr=spider&for=pc	1	/	M		N		Home; Private car		2020-02-07	2020-01-14

## Sheet: Data of Figure 2a
		Province	2020-01-19	2020-01-20	2020-01-21	2020-01-22	2020-01-23	2020-01-24	2020-01-25	2020-01-26	2020-01-27	2020-01-28	2020-01-29	2020-01-30	2020-01-31	2020-02-01	2020-02-02	2020-02-03	2020-02-04	2020-02-05	2020-02-06	2020-02-07	2020-02-08	2020-02-09	2020-02-10	2020-02-11	2020-02-12	2020-02-13	2020-02-14	2020-02-15	2020-02-16	2020-02-17	2020-02-18	2020-02-19	2020-02-20	2020-02-21	2020-02-22	2020-02-23	2020-02-24	2020-02-25	2020-02-26	2020-02-27	2020-02-28	2020-02-29	2020-03-01	2020-03-02	2020-03-03	2020-03-04	2020-03-05
辽宁省		Liaoning Province	0	0	0	2	4	12	17	22	27	36	39	45	60	64	70	74	81	89	94	99	105	107	108	116	116	117	119	120	121	121	121	121	121	121	121	121	121	121	121	121	121	122	122	125	125	125	125
沈阳	SY	Shenyang	0	0	0	1	2	3	5	6	7	8	9	10	12	12	13	15	18	23	23	25	26	26	26	28	28	28	28	28	28	28	28	28	28	28	28	28	28	28	28	28	28	28	28	28	28	28	28
大连	DL	Dalian	0	0	0	1	1	2	4	4	5	5	5	7	8	10	12	12	13	14	14	14	16	16	16	16	16	17	18	18	19	19	19	19	19	19	19	19	19	19	19	19	19	19	19	19	19	19	19
鞍山	AS	Anshan	0	0	0	0	0	0	0	0	0	0	0	0	1	1	1	1	1	1	3	3	3	3	3	3	3	3	4	4	4	4	4	4	4	4	4	4	4	4	4	4	4	4	4	4	4	4	4
本溪	BX	Benxi	0	0	0	0	0	1	1	2	2	2	2	3	3	3	3	3	3	3	3	3	3	3	3	3	3	3	3	3	3	3	3	3	3	3	3	3	3	3	3	3	3	3	3	3	3	3	3
丹东	DD	Dandong	0	0	0	0	0	0	0	1	4	5	5	5	5	6	6	6	6	7	7	7	7	7	7	7	7	7	7	7	7	7	7	7	7	7	7	7	7	7	7	7	7	8	8	11	11	11	11
锦州	JZ	Jinzhou	0	0	0	0	0	0	0	0	0	4	4	4	7	7	7	7	7	7	7	8	10	11	11	12	12	12	12	12	12	12	12	12	12	12	12	12	12	12	12	12	12	12	12	12	12	12	12
营口	YK	Yingkou	0	0	0	0	0	0	1	1	1	1	1	1	1	1	1	1	1	1	1	1	1	1	1	1	1	1	1	1	1	1	1	1	1	1	1	1	1	1	1	1	1	1	1	1	1	1	1
阜新	FX	Fuxin	0	0	0	0	0	0	0	0	0	0	0	0	1	2	3	5	7	7	7	7	7	7	8	8	8	8	8	8	8	8	8	8	8	8	8	8	8	8	8	8	8	8	8	8	8	8	8
辽阳	LY	Liaoyang	0	0	0	0	0	0	0	0	0	1	1	1	1	1	2	2	2	2	2	2	3	3	3	3	3	3	3	3	3	3	3	3	3	3	3	3	3	3	3	3	3	3	3	3	3	3	3
铁岭	TL	Tieling	0	0	0	0	0	2	2	2	2	2	2	2	3	3	3	3	3	3	3	3	3	4	4	7	7	7	7	7	7	7	7	7	7	7	7	7	7	7	7	7	7	7	7	7	7	7	7
朝阳	CY	Chaoyang	0	0	0	0	1	2	2	2	2	3	4	5	6	6	6	6	6	6	6	6	6	6	6	6	6	6	6	6	6	6	6	6	6	6	6	6	6	6	6	6	6	6	6	6	6	6	6
盘锦	PJ	Panjin	0	0	0	0	0	0	0	2	2	2	2	3	7	7	8	8	8	8	11	11	11	11	11	11	11	11	11	11	11	11	11	11	11	11	11	11	11	11	11	11	11	11	11	11	11	11	11
葫芦岛	HLD	Huludao	0	0	0	0	0	2	2	2	2	3	4	4	5	5	5	5	6	7	7	9	9	9	9	11	11	11	11	12	12	12	12	12	12	12	12	12	12	12	12	12	12	12	12	12	12	12	12
抚顺	FS	Fushun	0	0	0	0	0	0	0	0	0	0	0	0	0	0	0	0	0	0	0	0	0	0	0	0	0	0	0	0	0	0	0	0	0	0	0	0	0	0	0	0	0	0	0	0	0	0	0
吉林省	JP	Jilin Province	0	0	0	0	1	4	4	6	8	9	14	14	17	23	31	42	54	59	65	69	78	80	81	83	84	86	88	89	89	89	90	91	91	91	91	93	93	93	93	93	93	93	93	93	93	93	93
长春	CC	Changchun	0	0	0	0	1	1	1	1	1	1	4	4	7	13	17	18	28	29	32	32	37	39	40	42	42	43	44	45	45	45	45	45	45	45	45	45	45	45	45	45	45	45	45	45	45	45	45
四平	SP	Siping	0	0	0	0	0	0	0	1	1	1	1	1	1	1	4	7	8	9	10	10	12	12	12	12	13	14	14	14	14	14	15	15	15	15	15	15	15	15	15	15	15	15	15	15	15	15	15
	公主岭		0	0	0	0	0	0	0	0	1	1	1	1	1	1	1	3	4	4	4	6	6	6	6	6	6	6	6	6	6	6	6	6	6	6	6	6	6	6	6	6	6	6	6	6	6	6	6
辽源	LY2	Liaoyuan	0	0	0	0	0	0	0	0	0	0	0	0	0	0	0	3	3	5	5	6	6	6	6	6	6	6	7	7	7	7	7	7	7	7	7	7	7	7	7	7	7	7	7	7	7	7	7
通化	TH	Tonghua	0	0	0	0	0	0	0	0	0	1	1	1	1	1	1	1	1	1	2	2	3	3	3	3	3	3	3	3	3	3	3	4	4	4	4	6	6	6	6	6	6	6	6	6	6	6	6
	梅河口		0	0	0	0	0	0	0	0	0	0	0	0	0	0	0	0	0	0	0	0	1	1	1	1	1	1	1	1	1	1	1	1	1	1	1	1	1	1	1	1	1	1	1	1	1	1	1
吉林(市)	JL	Jilin (city)	0	0	0	0	0	2	2	2	3	3	3	3	3	3	4	5	5	5	5	5	5	5	5	5	5	5	5	5	5	5	5	5	5	5	5	5	5	5	5	5	5	5	5	5	5	5	5
延边朝鲜族自治州	YKA	Yanbian Korean Autonomous Prefecture	0	0	0	0	0	0	0	0	0	0	2	2	2	2	2	3	3	4	5	5	5	5	5	5	5	5	5	5	5	5	5	5	5	5	5	5	5	5	5	5	5	5	5	5	5	5	5
松原	SY2	Songyuan	0	0	0	0	0	1	1	2	2	2	2	2	2	2	2	2	2	2	2	2	2	2	2	2	2	2	2	2	2	2	2	2	2	2	2	2	2	2	2	2	2	2	2	2	2	2	2
白城	BC	Baicheng	0	0	0	0	0	0	0	0	0	0	0	0	0	0	0	0	0	0	0	1	1	1	1	1	1	1	1	1	1	1	1	1	1	1	1	1	1	1	1	1	1	1	1	1	1	1	1
白山	BS	Baishan	0	0	0	0	0	0	0	0	0	0	0	0	0	0	0	0	0	0	0	0	0	0	0	0	0	0	0	0	0	0	0	0	0	0	0	0	0	0	0	0	0	0	0	0	0	0	0
黑龙江省	HP	Heilongjiang Province	0	0	0	0	4	9	15	21	30	37	43	59	80	95	118	155	190	227	277	295	307	321	360	378	395	418	425	445	457	464	470	476	479	479	480	480	480	480	480	480	480	480	480	480	480	481	481
哈尔滨	H	Harbin	0	0	0	0	1	6	8	8	10	11	13	18	25	34	45	63	73	82	94	100	114	128	146	150	159	164	167	182	188	190	192	194	197	197	198	198	198	198	198	198	198	198	198	198	198	198	198
双鸭山	SYS	Shuangyashan	0	0	0	0	0	0	0	1	1	1	1	1	2	4	7	12	16	20	36	36	38	28	38	39	39	48	48	49	50	52	52	52	52	52	52	52	52	52	52	52	52	52	52	52	52	52	52
绥化	SH	Suihua	0	0	0	0	1	1	2	3	8	8	10	12	13	14	16	22	24	29	39	44	35	37	39	43	45	45	46	46	46	46	47	47	47	47	47	47	47	47	47	47	47	47	47	47	47	47	47
鸡西	JX	Jixi	0	0	0	0	0	0	0	0	0	1	1	2	4	4	6	9	12	21	29	31	34	34	38	43	44	44	45	46	46	46	46	46	46	46	46	46	46	46	46	46	46	46	46	46	46	46	46
齐齐哈尔	Q	Qiqihar	0	0	0	0	0	0	1	1	2	3	3	3	3	3	3	6	20	26	27	27	27	30	32	33	33	36	36	38	42	43	43	43	43	43	43	43	43	43	43	43	43	43	43	43	43	43	43
大庆	DQ	Daqing	0	0	0	0	1	1	3	5	5	5	5	7	8	8	11	11	11	13	13	13	13	13	14	15	15	18	19	19	20	20	23	26	26	26	26	26	26	26	26	26	26	26	26	26	26	26	26
七台河	QTH	Qitaihe	0	0	0	0	0	0	0	1	2	2	2	3	5	6	7	8	9	9	10	11	13	14	15	15	16	16	16	16	16	17	17	17	17	17	17	17	17	17	17	17	17	17	17	17	17	17	17
牡丹江	MDJ	Mudanjiang	0	0	0	0	1	1	1	1	1	1	1	2	6	7	8	8	9	10	11	13	12	12	12	12	12	12	12	12	12	13	13	14	14	14	14	14	14	14	14	14	14	14	14	14	14	15	15
佳木斯	JMS	Jiamusi	0	0	0	0	0	0	0	1	1	5	5	8	11	11	11	11	11	12	13	13	13	14	15	15	15	15	15	15	15	15	15	15	15	15	15	15	15	15	15	15	15	15	15	15	15	15	15
黑河	HH	Heihe	0	0	0	0	0	0	0	0	0	0	0	0	0	1	1	1	1	1	1	2	2	4	4	6	10	13	13	14	14	14	14	14	14	14	14	14	14	14	14	14	14	14	14	14	14	14	14
鹤岗	HG	Hegang	0	0	0	0	0	0	0	0	0	0	1	1	1	1	1	2	2	2	2	3	4	5	5	5	5	5	5	5	5	5	5	5	5	5	5	5	5	5	5	5	5	5	5	5	5	5	5
大兴安岭	DHL	Da Hinggan Ling Prefecture	0	0	0	0	0	0	0	0	0	0	1	2	2	2	2	2	2	2	2	2	2	2	2	2	2	2	2	2	2	2	2	2	2	2	2	2	2	2	2	2	2	2	2	2	2	2	2
伊春	YC	Yichun	0	0	0	0	0	0	0	0	0	0	0	0	0	0	0	0	0	0	0	0	0	0	0	0	0	0	1	1	1	1	1	1	1	1	1	1	1	1	1	1	1	1	1	1	1	1	1
	辽宁省	沈阳	大连	鞍山	本溪	丹东	锦州	营口	阜新	辽阳	铁岭	朝阳	盘锦	葫芦岛	抚顺	吉林省	长春	四平		辽源	通化		吉林(市)	延边朝鲜族自治州	松原	白城	白山	黑龙江省	哈尔滨	双鸭山	绥化	鸡西	齐齐哈尔	大庆	七台河	牡丹江	佳木斯	黑河	鹤岗	大兴安岭	伊春
		SY	DL	AS	BX	DD	JZ	YK	FX	LY	TL	CY	PJ	HLD	FS	JP	CC	SP	公主岭	LY2	TH	梅河口	JL	YKA	SY2	BC	BS	HP	H	SYS	SH	JX	Q	DQ	QTH	MDJ	JMS	HH	HG	DHL	YC
Province	Liaoning Province	Shenyang	Dalian	Anshan	Benxi	Dandong	Jinzhou	Yingkou	Fuxin	Liaoyang	Tieling	Chaoyang	Panjin	Huludao	Fushun	Jilin Province	Changchun	Siping		Liaoyuan	Tonghua		Jilin (city)	Yanbian Korean Autonomous Prefecture	Songyuan	Baicheng	Baishan	Heilongjiang Province	Harbin	Shuangyashan	Suihua	Jixi	Qiqihar	Daqing	Qitaihe	Mudanjiang	Jiamusi	Heihe	Hegang	Da Hinggan Ling Prefecture	Yichun
2020-01-19	0	0	0	0	0	0	0	0	0	0	0	0	0	0	0	0	0	0	0	0	0	0	0	0	0	0	0	0	0	0	0	0	0	0	0	0	0	0	0	0	0
2020-01-20	0	0	0	0	0	0	0	0	0	0	0	0	0	0	0	0	0	0	0	0	0	0	0	0	0	0	0	0	0	0	0	0	0	0	0	0	0	0	0	0	0
2020-01-21	0	0	0	0	0	0	0	0	0	0	0	0	0	0	0	0	0	0	0	0	0	0	0	0	0	0	0	0	0	0	0	0	0	0	0	0	0	0	0	0	0
2020-01-22	2	1	1	0	0	0	0	0	0	0	0	0	0	0	0	0	0	0	0	0	0	0	0	0	0	0	0	0	0	0	0	0	0	0	0	0	0	0	0	0	0
2020-01-23	4	2	1	0	0	0	0	0	0	0	0	1	0	0	0	1	1	0	0	0	0	0	0	0	0	0	0	4	1	0	1	0	0	1	0	1	0	0	0	0	0
2020-01-24	12	3	2	0	1	0	0	0	0	0	2	2	0	2	0	4	1	0	0	0	0	0	2	0	1	0	0	9	6	0	1	0	0	1	0	1	0	0	0	0	0
2020-01-25	17	5	4	0	1	0	0	1	0	0	2	2	0	2	0	4	1	0	0	0	0	0	2	0	1	0	0	15	8	0	2	0	1	3	0	1	0	0	0	0	0
2020-01-26	22	6	4	0	2	1	0	1	0	0	2	2	2	2	0	6	1	1	0	0	0	0	2	0	2	0	0	21	8	1	3	0	1	5	1	1	1	0	0	0	0
2020-01-27	27	7	5	0	2	4	0	1	0	0	2	2	2	2	0	8	1	1	1	0	0	0	3	0	2	0	0	30	10	1	8	0	2	5	2	1	1	0	0	0	0
2020-01-28	36	8	5	0	2	5	4	1	0	1	2	3	2	3	0	9	1	1	1	0	1	0	3	0	2	0	0	37	11	1	8	1	3	5	2	1	5	0	0	0	0
2020-01-29	39	9	5	0	2	5	4	1	0	1	2	4	2	4	0	14	4	1	1	0	1	0	3	2	2	0	0	43	13	1	10	1	3	5	2	1	5	0	1	1	0
2020-01-30	45	10	7	0	3	5	4	1	0	1	2	5	3	4	0	14	4	1	1	0	1	0	3	2	2	0	0	59	18	1	12	2	3	7	3	2	8	0	1	2	0
2020-01-31	60	12	8	1	3	5	7	1	1	1	3	6	7	5	0	17	7	1	1	0	1	0	3	2	2	0	0	80	25	2	13	4	3	8	5	6	11	0	1	2	0
2020-02-01	64	12	10	1	3	6	7	1	2	1	3	6	7	5	0	23	13	1	1	0	1	0	3	2	2	0	0	95	34	4	14	4	3	8	6	7	11	1	1	2	0
2020-02-02	70	13	12	1	3	6	7	1	3	2	3	6	8	5	0	31	17	4	1	0	1	0	4	2	2	0	0	118	45	7	16	6	3	11	7	8	11	1	1	2	0
2020-02-03	74	15	12	1	3	6	7	1	5	2	3	6	8	5	0	42	18	7	3	3	1	0	5	3	2	0	0	155	63	12	22	9	6	11	8	8	11	1	2	2	0
2020-02-04	81	18	13	1	3	6	7	1	7	2	3	6	8	6	0	54	28	8	4	3	1	0	5	3	2	0	0	190	73	16	24	12	20	11	9	9	11	1	2	2	0
2020-02-05	89	23	14	1	3	7	7	1	7	2	3	6	8	7	0	59	29	9	4	5	1	0	5	4	2	0	0	227	82	20	29	21	26	13	9	10	12	1	2	2	0
2020-02-06	94	23	14	3	3	7	7	1	7	2	3	6	11	7	0	65	32	10	4	5	2	0	5	5	2	0	0	277	94	36	39	29	27	13	10	11	13	1	2	2	0
2020-02-07	99	25	14	3	3	7	8	1	7	2	3	6	11	9	0	69	32	10	6	6	2	0	5	5	2	1	0	295	100	36	44	31	27	13	11	13	13	2	3	2	0
2020-02-08	105	26	16	3	3	7	10	1	7	3	3	6	11	9	0	78	37	12	6	6	3	1	5	5	2	1	0	307	114	38	35	34	27	13	13	12	13	2	4	2	0
2020-02-09	107	26	16	3	3	7	11	1	7	3	4	6	11	9	0	80	39	12	6	6	3	1	5	5	2	1	0	321	128	28	37	34	30	13	14	12	14	4	5	2	0
2020-02-10	108	26	16	3	3	7	11	1	8	3	4	6	11	9	0	81	40	12	6	6	3	1	5	5	2	1	0	360	146	38	39	38	32	14	15	12	15	4	5	2	0
2020-02-11	116	28	16	3	3	7	12	1	8	3	7	6	11	11	0	83	42	12	6	6	3	1	5	5	2	1	0	378	150	39	43	43	33	15	15	12	15	6	5	2	0
2020-02-12	116	28	16	3	3	7	12	1	8	3	7	6	11	11	0	84	42	13	6	6	3	1	5	5	2	1	0	395	159	39	45	44	33	15	16	12	15	10	5	2	0
2020-02-13	117	28	17	3	3	7	12	1	8	3	7	6	11	11	0	86	43	14	6	6	3	1	5	5	2	1	0	418	164	48	45	44	36	18	16	12	15	13	5	2	0
2020-02-14	119	28	18	4	3	7	12	1	8	3	7	6	11	11	0	88	44	14	6	7	3	1	5	5	2	1	0	425	167	48	46	45	36	19	16	12	15	13	5	2	1
2020-02-15	120	28	18	4	3	7	12	1	8	3	7	6	11	12	0	89	45	14	6	7	3	1	5	5	2	1	0	445	182	49	46	46	38	19	16	12	15	14	5	2	1
2020-02-16	121	28	19	4	3	7	12	1	8	3	7	6	11	12	0	89	45	14	6	7	3	1	5	5	2	1	0	457	188	50	46	46	42	20	16	12	15	14	5	2	1
2020-02-17	121	28	19	4	3	7	12	1	8	3	7	6	11	12	0	89	45	14	6	7	3	1	5	5	2	1	0	464	190	52	46	46	43	20	17	13	15	14	5	2	1
2020-02-18	121	28	19	4	3	7	12	1	8	3	7	6	11	12	0	90	45	15	6	7	3	1	5	5	2	1	0	470	192	52	47	46	43	23	17	13	15	14	5	2	1
2020-02-19	121	28	19	4	3	7	12	1	8	3	7	6	11	12	0	91	45	15	6	7	4	1	5	5	2	1	0	476	194	52	47	46	43	26	17	14	15	14	5	2	1
2020-02-20	121	28	19	4	3	7	12	1	8	3	7	6	11	12	0	91	45	15	6	7	4	1	5	5	2	1	0	479	197	52	47	46	43	26	17	14	15	14	5	2	1
2020-02-21	121	28	19	4	3	7	12	1	8	3	7	6	11	12	0	91	45	15	6	7	4	1	5	5	2	1	0	479	197	52	47	46	43	26	17	14	15	14	5	2	1
2020-02-22	121	28	19	4	3	7	12	1	8	3	7	6	11	12	0	91	45	15	6	7	4	1	5	5	2	1	0	480	198	52	47	46	43	26	17	14	15	14	5	2	1
2020-02-23	121	28	19	4	3	7	12	1	8	3	7	6	11	12	0	93	45	15	6	7	6	1	5	5	2	1	0	480	198	52	47	46	43	26	17	14	15	14	5	2	1
2020-02-24	121	28	19	4	3	7	12	1	8	3	7	6	11	12	0	93	45	15	6	7	6	1	5	5	2	1	0	480	198	52	47	46	43	26	17	14	15	14	5	2	1
2020-02-25	121	28	19	4	3	7	12	1	8	3	7	6	11	12	0	93	45	15	6	7	6	1	5	5	2	1	0	480	198	52	47	46	43	26	17	14	15	14	5	2	1
2020-02-26	121	28	19	4	3	7	12	1	8	3	7	6	11	12	0	93	45	15	6	7	6	1	5	5	2	1	0	480	198	52	47	46	43	26	17	14	15	14	5	2	1
2020-02-27	121	28	19	4	3	7	12	1	8	3	7	6	11	12	0	93	45	15	6	7	6	1	5	5	2	1	0	480	198	52	47	46	43	26	17	14	15	14	5	2	1
2020-02-28	121	28	19	4	3	7	12	1	8	3	7	6	11	12	0	93	45	15	6	7	6	1	5	5	2	1	0	480	198	52	47	46	43	26	17	14	15	14	5	2	1
2020-02-29	122	28	19	4	3	8	12	1	8	3	7	6	11	12	0	93	45	15	6	7	6	1	5	5	2	1	0	480	198	52	47	46	43	26	17	14	15	14	5	2	1
2020-03-01	122	28	19	4	3	8	12	1	8	3	7	6	11	12	0	93	45	15	6	7	6	1	5	5	2	1	0	480	198	52	47	46	43	26	17	14	15	14	5	2	1
2020-03-02	125	28	19	4	3	11	12	1	8	3	7	6	11	12	0	93	45	15	6	7	6	1	5	5	2	1	0	480	198	52	47	46	43	26	17	14	15	14	5	2	1
2020-03-03	125	28	19	4	3	11	12	1	8	3	7	6	11	12	0	93	45	15	6	7	6	1	5	5	2	1	0	480	198	52	47	46	43	26	17	14	15	14	5	2	1
2020-03-04	125	28	19	4	3	11	12	1	8	3	7	6	11	12	0	93	45	15	6	7	6	1	5	5	2	1	0	481	198	52	47	46	43	26	17	15	15	14	5	2	1
2020-03-05	125	28	19	4	3	11	12	1	8	3	7	6	11	12	0	93	45	15	6	7	6	1	5	5	2	1	0	481	198	52	47	46	43	26	17	15	15	14	5	2	1
2020-03-06	125	28	19	4	3	11	12	1	8	3	7	6	11	12	0	93	45	15	6	7	6	1	5	5	2	1	0	481	198	52	47	46	43	26	17	15	15	14	5	2	1
2020-03-07	125	28	19	4	3	11	12	1	8	3	7	6	11	12	0	93	45	15	6	7	6	1	5	5	2	1	0	481	198	52	47	46	43	26	17	15	15	14	5	2	1
2020-03-08	125	28	19	4	3	11	12	1	8	3	7	6	11	12	0	93	45	15	6	7	6	1	5	5	2	1	0	481	198	52	47	46	43	26	17	15	15	14	5	2	1
	Data was from the website of Health Committee of each provinces
	Liaoning		http://wsjk.ln.gov.cn/wst_wsjskx/
	Jilin		http://wsjkw.jl.gov.cn/xwzx/xwfb/
	Heilongjiang		http://wsjkw.hlj.gov.cn/index.php/Home/Zwgk/all/typeid/42
Province	Liaoning Province	Shenyang	Dalian	Anshan	Benxi	Dandong	Jinzhou	Yingkou	Fuxin	Liaoyang	Tieling	Chaoyang	Panjin	Huludao	Fushun	Jilin Province	Changchun	Siping		Liaoyuan	Tonghua		Jilin (city)	Yanbian Korean Autonomous Prefecture	Songyuan	Baicheng	Baishan	Heilongjiang Province	Harbin	Shuangyashan	Suihua	Jixi	Qiqihar	Daqing	Qitaihe	Mudanjiang	Jiamusi	Heihe	Hegang	Da Hinggan Ling Prefecture	Yichun
Abbr.		SY	DL	AS	BX	DD	JZ	YK	FX	LY	TL	CY	PJ	HLD	FS	JP	CC	SP	Gongzhuling	LY2	TH	Meihekou	JL	YKA	SY2	BC	BS	HP	H	SYS	SH	JX	Q	DQ	QTH	MDJ	JMS	HH	HG	DHL	YC
2020-01-19	0	0	0	0	0	0	0	0	0	0	0	0	0	0	0	0	0	0	0	0	0	0	0	0	0	0	0	0	0	0	0	0	0	0	0	0	0	0	0	0	0
2020-01-20	0	0	0	0	0	0	0	0	0	0	0	0	0	0	0	0	0	0	0	0	0	0	0	0	0	0	0	0	0	0	0	0	0	0	0	0	0	0	0	0	0
2020-01-21	0	0	0	0	0	0	0	0	0	0	0	0	0	0	0	0	0	0	0	0	0	0	0	0	0	0	0	0	0	0	0	0	0	0	0	0	0	0	0	0	0
2020-01-22	2	1	1	0	0	0	0	0	0	0	0	0	0	0	0	0	0	0	0	0	0	0	0	0	0	0	0	0	0	0	0	0	0	0	0	0	0	0	0	0	0
2020-01-23	2	1	0	0	0	0	0	0	0	0	0	1	0	0	0	1	1	0	0	0	0	0	0	0	0	0	0	4	1	0	1	0	0	1	0	1	0	0	0	0	0
2020-01-24	8	1	1	0	1	0	0	0	0	0	2	1	0	2	0	3	0	0	0	0	0	0	2	0	1	0	0	5	5	0	0	0	0	0	0	0	0	0	0	0	0
2020-01-25	5	2	2	0	0	0	0	1	0	0	0	0	0	0	0	0	0	0	0	0	0	0	0	0	0	0	0	6	2	0	1	0	1	2	0	0	0	0	0	0	0
2020-01-26	5	1	0	0	1	1	0	0	0	0	0	0	2	0	0	2	0	1	0	0	0	0	0	0	1	0	0	6	0	1	1	0	0	2	1	0	1	0	0	0	0
2020-01-27	5	1	1	0	0	3	0	0	0	0	0	0	0	0	0	2	0	0	1	0	0	0	1	0	0	0	0	9	2	0	5	0	1	0	1	0	0	0	0	0	0
2020-01-28	9	1	0	0	0	1	4	0	0	1	0	1	0	1	0	1	0	0	0	0	1	0	0	0	0	0	0	7	1	0	0	1	1	0	0	0	4	0	0	0	0
2020-01-29	3	1	0	0	0	0	0	0	0	0	0	1	0	1	0	5	3	0	0	0	0	0	0	2	0	0	0	6	2	0	2	0	0	0	0	0	0	0	1	1	0
2020-01-30	6	1	2	0	1	0	0	0	0	0	0	1	1	0	0	0	0	0	0	0	0	0	0	0	0	0	0	16	5	0	2	1	0	2	1	1	3	0	0	1	0
2020-01-31	15	2	1	1	0	0	3	0	1	0	1	1	4	1	0	3	3	0	0	0	0	0	0	0	0	0	0	21	7	1	1	2	0	1	2	4	3	0	0	0	0
2020-02-01	4	0	2	0	0	1	0	0	1	0	0	0	0	0	0	6	6	0	0	0	0	0	0	0	0	0	0	15	9	2	1	0	0	0	1	1	0	1	0	0	0
2020-02-02	6	1	2	0	0	0	0	0	1	1	0	0	1	0	0	8	4	3	0	0	0	0	1	0	0	0	0	23	11	3	2	2	0	3	1	1	0	0	0	0	0
2020-02-03	4	2	0	0	0	0	0	0	2	0	0	0	0	0	0	11	1	3	2	3	0	0	1	1	0	0	0	37	18	5	6	3	3	0	1	0	0	0	1	0	0
2020-02-04	7	3	1	0	0	0	0	0	2	0	0	0	0	1	0	12	10	1	1	0	0	0	0	0	0	0	0	35	10	4	2	3	14	0	1	1	0	0	0	0	0
2020-02-05	8	5	1	0	0	1	0	0	0	0	0	0	0	1	0	5	1	1	0	2	0	0	0	1	0	0	0	37	9	4	5	9	6	2	0	1	1	0	0	0	0
2020-02-06	5	0	0	2	0	0	0	0	0	0	0	0	3	0	0	6	3	1	0	0	1	0	0	1	0	0	0	50	12	16	10	8	1	0	1	1	1	0	0	0	0
2020-02-07	5	2	0	0	0	0	1	0	0	0	0	0	0	2	0	4	0	0	2	1	0	0	0	0	0	1	0	18	6	0	5	2	0	0	1	2	0	1	1	0	0
2020-02-08	6	1	2	0	0	0	2	0	0	1	0	0	0	0	0	9	5	2	0	0	1	1	0	0	0	0	0	12	14	2	-9	3	0	0	2	-1	0	0	1	0	0
2020-02-09	2	0	0	0	0	0	1	0	0	0	1	0	0	0	0	2	2	0	0	0	0	0	0	0	0	0	0	14	14	-10	2	0	3	0	1	0	1	2	1	0	0
2020-02-10	1	0	0	0	0	0	0	0	1	0	0	0	0	0	0	1	1	0	0	0	0	0	0	0	0	0	0	39	18	10	2	4	2	1	1	0	1	0	0	0	0
2020-02-11	8	2	0	0	0	0	1	0	0	0	3	0	0	2	0	2	2	0	0	0	0	0	0	0	0	0	0	18	4	1	4	5	1	1	0	0	0	2	0	0	0
2020-02-12	0	0	0	0	0	0	0	0	0	0	0	0	0	0	0	1	0	1	0	0	0	0	0	0	0	0	0	17	9	0	2	1	0	0	1	0	0	4	0	0	0
2020-02-13	1	0	1	0	0	0	0	0	0	0	0	0	0	0	0	2	1	1	0	0	0	0	0	0	0	0	0	23	5	9	0	0	3	3	0	0	0	3	0	0	0
2020-02-14	2	0	1	1	0	0	0	0	0	0	0	0	0	0	0	2	1	0	0	1	0	0	0	0	0	0	0	7	3	0	1	1	0	1	0	0	0	0	0	0	1
2020-02-15	1	0	0	0	0	0	0	0	0	0	0	0	0	1	0	1	1	0	0	0	0	0	0	0	0	0	0	20	15	1	0	1	2	0	0	0	0	1	0	0	0
2020-02-16	1	0	1	0	0	0	0	0	0	0	0	0	0	0	0	0	0	0	0	0	0	0	0	0	0	0	0	12	6	1	0	0	4	1	0	0	0	0	0	0	0
2020-02-17	0	0	0	0	0	0	0	0	0	0	0	0	0	0	0	0	0	0	0	0	0	0	0	0	0	0	0	7	2	2	0	0	1	0	1	1	0	0	0	0	0
2020-02-18	0	0	0	0	0	0	0	0	0	0	0	0	0	0	0	1	0	1	0	0	0	0	0	0	0	0	0	6	2	0	1	0	0	3	0	0	0	0	0	0	0
2020-02-19	0	0	0	0	0	0	0	0	0	0	0	0	0	0	0	1	0	0	0	0	1	0	0	0	0	0	0	6	2	0	0	0	0	3	0	1	0	0	0	0	0
2020-02-20	0	0	0	0	0	0	0	0	0	0	0	0	0	0	0	0	0	0	0	0	0	0	0	0	0	0	0	3	3	0	0	0	0	0	0	0	0	0	0	0	0
2020-02-21	0	0	0	0	0	0	0	0	0	0	0	0	0	0	0	0	0	0	0	0	0	0	0	0	0	0	0	0	0	0	0	0	0	0	0	0	0	0	0	0	0
2020-02-22	0	0	0	0	0	0	0	0	0	0	0	0	0	0	0	0	0	0	0	0	0	0	0	0	0	0	0	1	1	0	0	0	0	0	0	0	0	0	0	0	0
2020-02-23	0	0	0	0	0	0	0	0	0	0	0	0	0	0	0	2	0	0	0	0	2	0	0	0	0	0	0	0	0	0	0	0	0	0	0	0	0	0	0	0	0
2020-02-24	0	0	0	0	0	0	0	0	0	0	0	0	0	0	0	0	0	0	0	0	0	0	0	0	0	0	0	0	0	0	0	0	0	0	0	0	0	0	0	0	0
2020-02-25	0	0	0	0	0	0	0	0	0	0	0	0	0	0	0	0	0	0	0	0	0	0	0	0	0	0	0	0	0	0	0	0	0	0	0	0	0	0	0	0	0
2020-02-26	0	0	0	0	0	0	0	0	0	0	0	0	0	0	0	0	0	0	0	0	0	0	0	0	0	0	0	0	0	0	0	0	0	0	0	0	0	0	0	0	0
2020-02-27	0	0	0	0	0	0	0	0	0	0	0	0	0	0	0	0	0	0	0	0	0	0	0	0	0	0	0	0	0	0	0	0	0	0	0	0	0	0	0	0	0
2020-02-28	0	0	0	0	0	0	0	0	0	0	0	0	0	0	0	0	0	0	0	0	0	0	0	0	0	0	0	0	0	0	0	0	0	0	0	0	0	0	0	0	0
2020-02-29	1	0	0	0	0	1	0	0	0	0	0	0	0	0	0	0	0	0	0	0	0	0	0	0	0	0	0	0	0	0	0	0	0	0	0	0	0	0	0	0	0
2020-03-01	0	0	0	0	0	0	0	0	0	0	0	0	0	0	0	0	0	0	0	0	0	0	0	0	0	0	0	0	0	0	0	0	0	0	0	0	0	0	0	0	0
2020-03-02	3	0	0	0	0	3	0	0	0	0	0	0	0	0	0	0	0	0	0	0	0	0	0	0	0	0	0	0	0	0	0	0	0	0	0	0	0	0	0	0	0
2020-03-03	0	0	0	0	0	0	0	0	0	0	0	0	0	0	0	0	0	0	0	0	0	0	0	0	0	0	0	0	0	0	0	0	0	0	0	0	0	0	0	0	0
2020-03-04	0	0	0	0	0	0	0	0	0	0	0	0	0	0	0	0	0	0	0	0	0	0	0	0	0	0	0	1	0	0	0	0	0	0	0	1	0	0	0	0	0
2020-03-05	0	0	0	0	0	0	0	0	0	0	0	0	0	0	0	0	0	0	0	0	0	0	0	0	0	0	0	0	0	0	0	0	0	0	0	0	0	0	0	0	0
2020-03-06	0	0	0	0	0	0	0	0	0	0	0	0	0	0	0	0	0	0	0	0	0	0	0	0	0	0	0	0	0	0	0	0	0	0	0	0	0	0	0	0	0
2020-03-07	0	0	0	0	0	0	0	0	0	0	0	0	0	0	0	0	0	0	0	0	0	0	0	0	0	0	0	0	0	0	0	0	0	0	0	0	0	0	0	0	0
2020-03-08	0	0	0	0	0	0	0	0	0	0	0	0	0	0	0	0	0	0	0	0	0	0	0	0	0	0	0	0	0	0	0	0	0	0	0	0	0	0	0	0	0
	125															93												481
[truncated: 3 more columns]

## Sheet: Data of Figure 2c
Province	Abbr.	Cases	Imported cases	People (k)	Unknown source	Cases per million people	Imported ratio	=1-imported ratio
Liaoning Province		126	76	39830	11	3.16344	0.603175	0.396825	1.61048	13.1111	4.98936
Shenyang	SY	28	20	7330	5	3.81992	0.714286	0.285714	1.94469	10	2.14039
Dalian	DL	20	8	5950	5	3.36134	0.4	0.6	1.71123	18.8	1.92841
Jinzhou	JZ	12	8	2960	0	4.05405	0.666667	0.333333	2.06388	11.3333	1.36015
Huludao	HLD	12	8	2770	0	4.33213	0.666667	0.333333	2.20545	11.3333	1.31577
Panjin	PJ	11	5	1300	1	8.46154	0.454545	0.545455	4.30769	17.2727	0.901388
Dandong	DD	11	8	2350	0	4.68085	0.727273	0.272727	2.38298	9.63636	1.21192
Fuxin	FX	8	5	1860	0	4.30108	0.625	0.375	2.18964	12.5	1.07819
Tieling	TL	7	1	2940	0	2.38095	0.142857	0.857143	1.21212	26	1.35554
Chaoyang	CY	6	5	3360	0	1.78571	0.833333	0.166667	0.909091	6.66667	1.44914
Anshan	AS	4	1	3440	0	1.16279	0.25	0.75	0.591966	23	1.46629
Benxi	BX	3	3	1480	0	2.02703	1	0	1.03194	2	0.961769
Liaoyang	LY	3	3	1770	0	1.69492	1	0	0.862866	2	1.05178
Yingkou	YK	1	1	2320	0	0.431034	1	0	0.219436	2	1.20416
Fushun	FS	0	0	2110	0	0	0	1	0	30	1.14837
Jilin Province	JP	92	35	24940	5	3.68885	0.380435	0.619565	1.87796	19.3478	3.9481
Changchun	CC	45	18	7490	1	6.00801	0.4	0.6	3.05862	18.8	2.16362
Siping	SP	21	5	3200	2	6.5625	0.238095	0.761905	3.34091	23.3333	1.41421
Liaoyuan	LY2	7	2	1180	0	5.9322	0.285714	0.714286	3.02003	22	0.858778
Tonghua	TH	6	2	2170	1	2.76498	0.333333	0.666667	1.40762	20.6667	1.16458
Jilin (city)	JL	5	3	4150	0	1.20482	0.6	0.4	0.613363	13.2	1.61051
Yanbian Korean Autonomous Prefecture	YKA	5	4	2090	0	2.39234	0.8	0.2	1.21792	7.6	1.14291
Songyuan	SY2	2	1	2750	0	0.727273	0.5	0.5	0.370248	16	1.31101
Baicheng	BC	1	0	1910	1	0.52356	0	1	0.26654	30	1.09259
Baishan	BS	0	0	1200	0	0	0	1	0	30	0.866025
Heilongjiang Province	HP	494	102	35500	57	13.9155	0.206478	0.793522	7.08425	24.2186	4.71036
Harbin	Ha	200	42	9550	30	20.9424	0.21	0.79	10.6616	24.12	2.4431
Suihua	SH	53	8	5280	7	10.0379	0.150943	0.849057	5.11019	25.7736	1.81659
Shuangyashan	SYS	52	8	940	3	55.3191	0.153846	0.846154	28.1625	25.6923	0.766485
Jixi	JX	49	10	1750	6	28	0.204082	0.795918	14.2545	24.2857	1.04583
Qiqihar	Qi	43	4	5340	6	8.05243	0.0930233	0.906977	4.09942	27.3953	1.82688
Daqing	DQ	26	5	2730	0	9.52381	0.192308	0.807692	4.84848	24.6154	1.30624
Qitaihe	QTH	17	3	790	2	21.519	0.176471	0.823529	10.9551	25.0588	0.702673
Mudanjiang	MDJ	17	7	2550	0	6.66667	0.411765	0.588235	3.39394	18.4706	1.26244
Jiamusi	JMS	15	10	2350	0	6.38298	0.666667	0.333333	3.24952	11.3333	1.21192
Heihe	HH	14	0	1610	2	8.69565	0	1	4.42688	30	1.00312
Hegang	HG	5	3	1010	0	4.9505	0.6	0.4	2.52025	13.2	0.794512
Da Hinggan Ling Prefecture	DHL	2	2	440	0	4.54545	1	0	2.31405	2	0.524404
Yichun	YC	1	0	1160	1	0.862069	0	1	0.438871	30	0.851469
		100

## Sheet: Data of Figure 3
(a)
Class	Exposure time (day)	Unit exposure time (h)	Carrying population	Liaoning	Jilin	Heilongjiang	Infection population	Liaoning	Jilin	Heilongjiang
Home/Apartment/Residential estate	119616	168	712	126	92	494	526	81	62	383
Normal train	1618.24	15.56	104	13	22	76	56	6	11	39
High speed train	557.28	4.32	129	33	29	71	51	9	10	32
Hospital (except seeing a doctor for a fever; or seeing a doctor before being quarantined)	7618.87	35.11	217	253	149	945	29	0	2	27
Flight	364	4	91	33	21	48	26	12	5	9
Supermarket/shop	261	1	261	43	36	193	25	0	0	25
Restaurant	684.32	3.64	188	13	26	67	24	2	9	13
Mall	240.34	3.94	61	15	22	50	7	0	0	7
Play poker/mahjong at a room	101.08	3.61	28	0	4	28	7	0	0	7
Bus/Metro	199	1	199	33	18	148	4	0	0	4
Private car/Taxi	589	1	589	79	116	394	3	3	0	0
Clinic	150.12	1.39	108	26	4	39	2	2	0	0
Hotel	1404.48	12.54	112	32	8	67	0	0	0	0
Pharmacy	314.43	2.23	141	27	23	91	0	0	0	0
Office/Company	1155.15	7.65	151	19	10	102	0	0	0	0
(b)
	Liaoning	Liaoning	Liaoning	Jilin	Jilin	Jilin	Heilongjiang	Heilongjiang	Heilongjiang
	Intern-city	Over city	Over province	Intern-city	Over city	Over province	Intern-city	Over city	Over province
Family reunion	52	1	0	38	1	2	256	4	0
Restaurant	1	0	0	7	0	1	7	0	0
Public vehicle	6	6	5	2	7	4	29	12	3
Public buildings	0	1	0	1	1	0	66	5	0
Others	2	1	0	3	0	0	5	0	0
		37
		54	529	0.897921
		0.685185

## Sheet: Data of Figure 4
Provinces				Flight/Train number	2020-01-10	2020-01-11	2020-01-12	2020-01-13	2020-01-14	2020-01-15	2020-01-16	2020-01-17	2020-01-18	2020-01-19	2020-01-20	2020-01-21	2020-01-22	2020-01-23	2020-01-24	2020-01-25	2020-01-26	2020-01-27	2020-01-28	2020-01-29	2020-01-30	2020-01-31
L	J		H	G1278					Huludao-3,8		Huludao-1,2	Tieling-1			Changchun-22,23 Harbin-11 Harbin-12 Harbin-15	Harbin-8 Daqing-10		Harbin-4,5,6 Harbin-9 Shuangyashan-3
L	J		H	T182				Jiamusi-2,3,4		Jiamusi-6,7 Shuangyashan-2	Benxi-1,2 Siping-9 Siping-16,17 Liaoyuan-1 Harbin-10 Shuangyashan-1	Harbin-16	Harbin-13 Harbin-18 Qitaihe-1	Mudanjiang-2 Hegang-2 Changchun-26	Dandong-4			Harbin-43
L		H		Z236								Suihua-29														Shenyang-20
L		H		HU7789											Shenyang-4 Jiamusi-9
L				GJ8876													Shenyang-11			Shenyang-7,16,17,18
L				CZ6513								Dalian-20				Dandong-1
L				G1272	Shenyang-22				Shenyang-2	Shenyang-2 Shenyang-11	Shenyang-11	Shenyang-11	Shenyang-11	Shenyang-11	Shenyang-11	Shenyang-11
		J		G240			Panjin-3				Changchun-32
L		J		K7459											Tieling-4 Tieling-7 Changchun-26			Siping-10
L		J		DR6562									Shenyang-13 Dandong-7 Jilin-2 Siping-5
L		J		JD5627										Siping-1		Liaoyang-1	Jinzhou-4
		J		G8011										Changchun-2,6				Changchun-43,44
		J		C1001												Changchun-10	Yanbian-3
		J		G399										Changchun-12,32 (fellows)
		J		K429								Changchun-29						Tonghua-3
H		J		K974								Harbin-56			Yanbian-3		Harbin-1 Harbin-2 Harbin-3
H		J		T261		Jixi-34							Siping-5
H		J		CZ3695					Jiamusi-10					Changchun-1				Daqing-2
H				8L9891								Jiamusi-5 Jiamusi-15				Jiamusi-1
H				CA8943								Jiamusi-5 Jiamusi-15
H				CZ6278											GK-1,2		Harbin-39
H				G393							Jixi-1												Harbin-135
H				D131						Hegang-1	Jiamusi-6,7
H				D5383															Harbin-164		Harbin-78		Harbin-78
H				D6917												Qiqihar-4		Harbin-48
H				D7812		Harbin-70										Harbin-78
H				D7831					Jiamusi-2,3,4						Hegang-2
H				D8509												Harbin-11,12,15	Harbin-35,36
H				D8511												Mudanjiang-2	Mudanjiang-8
H				Z203/204		Harbin-32	Harbin-32	Harbin-32	Harbin-32	Harbin-32	Harbin-32	Harbin-32	Harbin-32	Harbin-32	Harbin-32	Harbin-32	Harbin-32 Harbin-64	Harbin-32 Daqing-18	Harbin-32	Harbin-32
H				K39	Jixi-21						Jixi-3	Jixi-1 Jixi-2
H				K7017						Shuangyashan-2			Shuangyashan-22			Shuangyashan-3
H				K7075											Jixi-12,30		Harbin-114 Harbin-122
H				K7178																					Harbin-114 Harbin-122
H				K7205	Jixi-21											Shuangyashan-4	Shuangyashan-23
Note:
Dark gray - train/flight departed from Wuhan was cancelled at the day (or the last day for the overnight trains)
Light gray - train/flight departed not from Wuhan was cancelled at the day (or the last day for the overnight trains)
Flight cancelling information is from the website of TRAVELSKY company
http://www.umetrip.com/mskyweb/main/index.html?hrefParam=index
Train cancelling information is from the website of 12306 CHINA RAILWAY
https://www.12306.cn/mormhweb/1/4/index_fl.html
